# Supplementary material for: A one pot synthesis of [1,3,4]-oxadiazoles mediated by molecular iodine
Source: Royal Society of Chemistry journal article supplement (doi:10.1039/c2ra00044j), 2012-01-01

# A one pot synthesis of [1,3,4]-oxadiazoles mediated by molecular iodine

Srimanta Guin, Saroj Kumar Rout, Tuhin Ghosh, Nilufa Khatun

and Bhisma K. Patel\*

Department of Chemistry, Indian Institute of Technology Guwahati, 781 039, Assam, India

[patel@iitg.ernet.in](mailto:patel@iitg.ernet.in)

## List of Contents

|                                                                           |        |
|---------------------------------------------------------------------------|--------|
| 1. Crystallographic description                                           | S2-S3  |
| 2. Spectral data                                                          | S4-S7  |
| 3. Spectra ( $^1\text{H}$ NMR, $^{13}\text{C}$ NMR and HRMS) of compounds | S8-S27 |

## Experimental:

### General remarks

Unless otherwise stated, all reagents were purchased from commercial sources and used without further purification. Reaction progress was monitored by TLC using Merck silica gel 60 F254 (0.25mm) with detection by UV or iodine. Chromatography was performed using Merck silica gel (60-120) mesh size with freshly distilled solvents. Columns were typically packed as slurry and equilibrated with the appropriate solvent system prior to use. <sup>1</sup>H NMR (400 MHz) and <sup>13</sup>C NMR (100 MHz) spectra were recorded on a Varian FT-400 MHz instrument using TMS as an internal standard. Data are presented as follows: chemical shift (ppm), multiplicity (s = singlet, d = doublet, t = triplet, m = multiplet, b = broad, brs = broad singlet, brm = broad multiplet, coupling constant *J* (Hz). Elemental analyses were carried out on a Perkin–Elmer 2400 automatic carbon, hydrogen, nitrogen and sulfur analyser. Melting points were recorded on Buchi B-545 melting point apparatus and are uncorrected. IR spectra were recorded in KBr or neat on a Nicolet Impact 410 spectrophotometer. Mass data were obtained with a WATERS MS system, Q-tof premier and data analyzed using Mass Lynx4.1.

**Crystallographic Analysis:** Crystal data were collected with Bruker Smart Apex-II CCD diffractometer using graphite by using graphite-monochromated Mo-*K*<sub>α</sub> radiation ( $\lambda = 0.71073 \text{ \AA}$ ) at 298 K. Cell parameters were retrieved using SMART <sup>1</sup>USA, 1995 software and refined with SAINT<sup>1</sup> for all observed reflections. Data reduction was performed with the SAINT software and corrected for Lorentzian and polarization effects. Absorption corrections were applied with the SADABS program.<sup>2</sup> The structures were solved by direct methods implemented in the SHELX-97<sup>3</sup> program and refined by full-matrix least-squares methods on *F*<sup>2</sup>. All non-hydrogen atom positions were located in difference Fourier maps and refined anisotropically. The hydrogen atoms were placed in their geometrically generated positions. The crystals were isolated in rectangular shape from ethyl acetate and hexane mixture at room temperature.

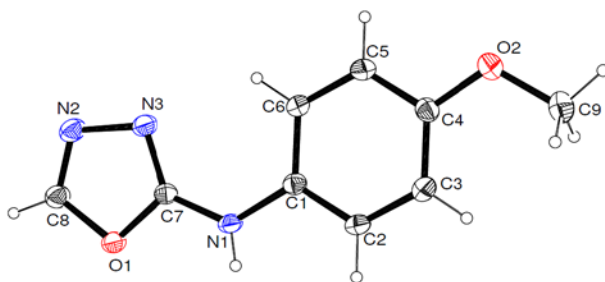

**Fig. 2** ORTEP view of *N*-(4-Methoxyphenyl)-1,3,4-oxadiazol-2-amine (**4a**).

**Crystallographic description of *N*-(4-Methoxyphenyl)-1,3,4-oxadiazol-2-amine (**4a**):**

$C_9H_9N_3O_2$ , crystal dimensions 0.38 x 0.32 x 0.28 mm,  $M_r = 191.19$ , triclinic, space group P-1,  $a = 8.2269(8)$ ,  $b = 10.1265(11)$ ,  $c = 11.1995(11)$  Å,  $\alpha = 84.312(6)^\circ$ ,  $\beta = 86.837(6)^\circ$ ,  $\gamma = 76.573(7)^\circ$ ,  $V = 902.56(16)$  Å<sup>3</sup>,  $Z = 4$ ,  $\rho_{\text{calcd}} = 1.407$  mg/m<sup>3</sup>,  $\mu = 0.103$  mm<sup>-1</sup>,  $F(000) = 400.0$ , reflection collected / unique = 4510 / 2747, refinement method = full-matrix least-squares on  $F^2$ , final  $R$  indices [ $I > 2\sigma(I)$ ]:  $R_1 = 0.0782$ ,  $wR_2 = 0.2253$ ,  $R$  indices (all data):  $R_1 = 0.1067$ ,  $wR_2 = 0.2489$ , goodness of fit = 1.093. CCDC-824583 for *N*-(4-Methoxyphenyl)-1,3,4-oxadiazol-2-amine (**4a**) contains the supplementary crystallographic data for this paper. These data can be obtained free of charge from The Cambridge Crystallographic Data Centre via [www.ccdc.cam.ac.uk/data\\_request/cif](http://www.ccdc.cam.ac.uk/data_request/cif).

## Spectral Data

***N*-Phenyl-1,3,4-oxadiazol-2-amine (1a):** Pinkish solid; M.p. 149-150 °C (Lit. M.p. 153-154 °C).<sup>4</sup> <sup>1</sup>H NMR (400 MHz, CDCl<sub>3</sub>): δ = 7.01 (t, 1H, *J* = 7.6 Hz), 7.31 (t, 2H, *J* = 7.6 Hz), 7.52 (d, 2H, *J* = 8.0 Hz), 8.44 (s, 1H) ppm. <sup>13</sup>C NMR (100 MHz, CDCl<sub>3</sub>): δ = 118.9, 123.9, 130.3, 139.9, 149.4, 162.1 ppm. IR (KBr): 3255, 3155, 3092, 3044, 2316, 1614, 1591, 1211, 1098, 1012, 755 cm<sup>-1</sup>. C<sub>8</sub>H<sub>7</sub>N<sub>3</sub>O (161.08): calcd. C 59.65, H 4.38, N 26.09; found C 59.61, H 4.32, N 26.13.

***N-p*-Tolyl-1,3,4-oxadiazol-2-amine (2a):** White solid; M.p. 129-132 °C. <sup>1</sup>H NMR (400 MHz, CD<sub>3</sub>OD): δ = 2.29 (s, 3H), 7.14 (d, 2H, *J* = 8.4 Hz), 7.38 (d, 2H, *J* = 8.4 Hz), 8.43 (s, 1H) ppm. <sup>13</sup>C NMR (100 MHz, CD<sub>3</sub>OD): δ = 20.9, 119.0, 130.8, 133.6, 137.4, 149.3, 162.3 ppm. IR (KBr): 3159, 2956, 2923, 2854, 1626, 1614, 1596, 1514, 1217, 1095, 1015, 819 cm<sup>-1</sup>. C<sub>9</sub>H<sub>9</sub>N<sub>3</sub>O (175.19): calcd. C 61.70, H 5.18, N 23.99; found C 61.66, H 5.23, N 23.96.

***N*-(2-Methoxyphenyl)-1,3,4-oxadiazol-2-amine (3a):** White solid; M.p. 103-105 °C. <sup>1</sup>H NMR (400 MHz, CD<sub>3</sub>OD): δ = 3.91 (s, 3H), 6.94-7.07 (m, 3H), 7.95 (d, 1H, *J* = 8 Hz), 8.46 (s, 1H) ppm. <sup>13</sup>C NMR (100 MHz, CD<sub>3</sub>OD): δ = 56.4, 111.9, 119.7, 121.9, 124.7, 128.7, 149.5, 150.2, 162.3 ppm. IR (KBr): 3367, 3147, 3087, 2940, 2840, 1623, 1590, 1548, 1464, 1252, 1097, 1023, 773, 758 cm<sup>-1</sup>. C<sub>9</sub>H<sub>9</sub>N<sub>3</sub>O<sub>2</sub> (191.19): calcd. C 56.54, H 4.74, N 21.98; found C 56.51, H 4.72, N 21.91.

***N*-(4-Methoxyphenyl)-1,3,4-oxadiazol-2-amine (4a):** Pink solid; M.p. 164-166 °C. <sup>1</sup>H NMR (400 MHz, CD<sub>3</sub>OD): δ = 3.76 (s, 3H), 6.90 (d, 2H, *J* = 9.2 Hz), 7.40 (d, 2H, *J* = 9.2), 8.40 (s, 1H) ppm. <sup>13</sup>C NMR (100 MHz, CD<sub>3</sub>OD): δ = 56.1, 115.6, 120.9, 133.1, 149.3, 157.3, 162.6 ppm. IR (KBr): 3234, 3142, 3046, 2341, 1614, 1511, 1237, 1097, 1032, 829 cm<sup>-1</sup>. C<sub>9</sub>H<sub>9</sub>N<sub>3</sub>O<sub>2</sub> (191.19): calcd. C 56.54, H 4.74, N 21.98; found C 56.59, H 4.69, N 21.97.

***N*-(3,4-Dimethylphenyl)-1,3,4-oxadiazol-2-amine (5a):** White solid; M.p. 133-135 °C. <sup>1</sup>H NMR (400 MHz, CD<sub>3</sub>OD): δ = 2.17 (s, 3H), 2.21 (s, 3H), 7.03 (d, 1H, *J* = 8.4 Hz), 7.19 (d, 1H, *J* = 8.4 Hz), 7.25 (s, 1H), 8.40 (s, 1H) ppm. <sup>13</sup>C NMR (100 MHz, CD<sub>3</sub>OD): δ = 19.3, 20.2, 116.5, 120.2, 131.2, 132.1, 137.5, 138.6, 149.2, 162.2 ppm. IR (KBr): 3444, 3228,

2923, 2854, 2288, 1626, 1503, 1328, 1096, 871, 817, 723  $\text{cm}^{-1}$ .  $\text{C}_{10}\text{H}_{11}\text{N}_3\text{O}$  (189.22): calcd. C 63.48, H 5.86, N 22.21; found C 63.44, H 5.89, N 22.19.

***N*-(2-Chlorophenyl)-1,3,4-oxadiazol-2-amine (6a)**: White solid; M.p. 57-60 °C.  $^1\text{H}$  NMR (400MHz,  $\text{CD}_3\text{OD}$ ):  $\delta$  = 7.07 (dt, 1H,  $J_1$  = 8.0 Hz,  $J_2$  = 1.6 Hz), 7.31 (dt, 1H,  $J_1$  = 8.0 Hz,  $J_2$  = 1.6 Hz), 7.41 (dd, 1H,  $J_1$  = 8.0 Hz,  $J_2$  = 1.2 Hz), 8.02 (dd, 1H,  $J_1$  = 7.6 Hz,  $J_2$  = 1.6 Hz), 8.51 (s, 1H) ppm.  $^{13}\text{C}$  NMR (100 MHz,  $\text{CD}_3\text{OD}$ ):  $\delta$  = 122.6, 125.9, 129.0, 131.0, 136.5, 143.4, 150.1, 162.3 ppm. IR (KBr): 3428, 3230, 2357, 1614, 1444, 1321, 1120, 1039, 737  $\text{cm}^{-1}$ .  $\text{C}_8\text{H}_6\text{ClN}_3\text{O}$  (195.61): calcd. C 49.12, H 3.09, N 21.48; found C 49.16, H 3.05, N 21.41.

***N*-(3-Chlorophenyl)-1,3,4-oxadiazol-2-amine (7a)**: White solid; M.p. 119-122 °C.  $^1\text{H}$  NMR (400 MHz,  $\text{CD}_3\text{OD}$ ):  $\delta$  = 6.96 (d, 1H,  $J$  = 8.0 Hz), 7.24 (t, 1H,  $J$  = 8.4 Hz), 7.36 (d, 1H,  $J$  = 8.4 Hz), 7.63 (s, 1H), 8.47 (s, 1H) ppm.  $^{13}\text{C}$  NMR (100 MHz,  $\text{CD}_3\text{OD}$ ):  $\delta$  = 116.8, 118.4, 123.5, 131.5, 135.9, 141.2, 149.6, 161.6 ppm. IR (KBr): 3435, 3153, 2924, 2853, 1687, 1599, 1502, 1484, 1217, 1065, 1025, 904, 852, 755  $\text{cm}^{-1}$ . HRMS (ESI): calcd. for  $\text{C}_8\text{H}_6\text{ClN}_3\text{O}$  ( $\text{MH}^+$ ) 196.0272; found 196.0278.

***N*-(4-Bromophenyl)-1,3,4-oxadiazol-2-amine (8a)**: Pink solid; M.p. 167-169 °C.  $^1\text{H}$  NMR (400 MHz,  $\text{CD}_3\text{OD}$ ):  $\delta$  = 7.38-7.44 (m, 4 H), 8.45 (s, 1H) ppm.  $^{13}\text{C}$  NMR (100 MHz,  $\text{CD}_3\text{OD}$ ):  $\delta$  = 115.9, 120.4, 133.2, 139.2, 149.5, 161.7 ppm. IR (KBr): 3277, 3092, 2925, 2854, 2399, 1609, 1405, 1093, 1008, 825, 777  $\text{cm}^{-1}$ .  $\text{C}_8\text{H}_6\text{BrN}_3\text{O}$  (240.06): calcd. C 40.03, H 2.52, N 17.50; found C 40.07, H 2.46, N 17.48.

***N*-(3-Nitrophenyl)-1,3,4-oxadiazol-2-amine (9a)**: Yellowish white solid; M.p. 189-191 °C.  $^1\text{H}$  NMR (400 MHz,  $\text{CD}_3\text{OD}$ ):  $\delta$  = 7.53 (t, 1H,  $J$  = 8.4 Hz), 7.83 (m, 2H), 8.52 (m, 3H) ppm.  $^{13}\text{C}$  NMR (100 MHz,  $\text{CD}_3\text{OD}$ ):  $\delta$  = 113.0, 118.0, 124.2, 131.4, 141.4, 149.9, 150.4, 161.5 ppm. IR (KBr): 3437, 3329, 3153, 2856, 1685, 1520, 1352, 1226, 1078, 1025, 934, 834, 735  $\text{cm}^{-1}$ .  $\text{C}_8\text{H}_6\text{N}_4\text{O}_3$  (206.16): calcd. C 46.61, H 2.93, N 27.18; found C 46.57, H 2.98, N 27.11. HRMS (ESI): calcd. for  $\text{C}_8\text{H}_6\text{N}_4\text{O}_3$  ( $\text{MH}^+$ ) 207.0513; found 207.0523.

***N*-(4-(Trifluoromethyl)phenyl)-1,3,4-oxadiazol-2-amine (10a)**: White solid; M.p. 166-169 °C.  $^1\text{H}$  NMR (400 MHz,  $\text{CD}_3\text{OD}$ ):  $\delta$  = 7.59 (d, 2H,  $J$  = 8.4 Hz), 7.69 (d, 2H,  $J$  = 8.4 Hz), 8.51 (s, 1H) ppm.  $^{13}\text{C}$  NMR (100 MHz,  $\text{CD}_3\text{OD}$ ):  $\delta$  = 118.4, 124.7, 125.1, 125.4, 127.5, 127.6,

143.4, 149.9, 161.6 ppm. IR (KBr): 3444, 3268, 2924, 1614, 1422, 1332, 1164, 1113, 1070, 1015, 838, 787  $\text{cm}^{-1}$ .  $\text{C}_9\text{H}_6\text{F}_3\text{N}_3\text{O}$  (229.16): calcd. C 47.17, H 2.64, F 24.87, N 18.34; found C 47.23, H 2.61, F 24.84, N 18.37. HRMS (ESI): calcd. for  $\text{C}_9\text{H}_6\text{F}_3\text{N}_3\text{O}$  ( $\text{MH}^+$ ) 230.0536; found 230.0539.

***N*-(Naphthalen-1-yl)-1,3,4-oxadiazol-2-amine (11a)**: Black solid; M.p. 136-139 °C.  $^1\text{H}$  NMR (400 MHz,  $\text{CD}_3\text{OD}$ ):  $\delta$  = 7.47-7.57 (m, 3H), 7.70 (d, 1H,  $J$  = 8 Hz), 7.86-7.91 (m, 2H), 8.12 (m, 1H), 8.48 (s, 1H) ppm.  $^{13}\text{C}$  NMR (100 MHz,  $\text{CD}_3\text{OD}$ ):  $\delta$  = 119.4, 122.8, 126.2, 126.8, 127.36, 127.42, 128.4, 129.6, 135.0, 135.9, 149.8, 163.6. ppm. IR (KBr): 3175, 2961, 2845, 1574, 1400, 1217, 1088, 1006, 780, 724  $\text{cm}^{-1}$ .  $\text{C}_{12}\text{H}_9\text{N}_3\text{O}$  (211.22): calcd. C 68.24, H 4.29, N 19.89; found C 68.29, H 4.26, N 19.83. HRMS (ESI): calcd for  $\text{C}_{12}\text{H}_9\text{N}_3\text{O}$  ( $\text{MH}^+$ ) 212.0818; found 212.0824.

***N*,5-Diphenyl-1,3,4-oxadiazol-2-amine (12a)**: White solid; M.p. 218-220 °C. (Lit. M.p. 214.9-215.9 °C).  $^5\text{H}$  NMR (400 MHz,  $\text{CD}_3\text{OD}$ ):  $\delta$  = 7.06 (t, 1H,  $J$  = 7.6 Hz), 7.36 (t, 2H,  $J$  = 6.8 Hz), 7.55 (m, 5H), 7.96 (m, 2H) ppm.  $^{13}\text{C}$  NMR (100 MHz,  $\text{CD}_3\text{OD}$  +  $\text{DMSO-}d_6$ ):  $\delta$  = 118.9, 123.9, 125.4, 127.2, 130.5, 130.6, 132.6, 140.0, 160.2, 162.0 ppm. IR (KBr): 3446, 3264, 3053, 2923, 1620, 1580, 1500, 1444, 1242, 1050, 1021, 745, 722, 685  $\text{cm}^{-1}$ .  $\text{C}_{14}\text{H}_{11}\text{N}_3\text{O}$  (237.26): calcd. C 70.87, H 4.67, N 17.71; found C 70.81; H 4.69, N 17.75. HRMS (ESI): calcd. for  $\text{C}_{14}\text{H}_{11}\text{N}_3\text{O}$  ( $\text{MH}^+$ ) 238.0975; found 238.0981.

**5-Phenyl-*N*-*p*-tolyl-1,3,4-oxadiazol-2-amine (13a)**: White solid; M.p. 214-217 °C (Lit. M.p. 214-216 °C).  $^6\text{H}$  NMR (400 MHz,  $\text{CD}_3\text{OD}$ ):  $\delta$  = 2.31 (s, 3H), 7.17 (d, 2H,  $J$  = 8.4 Hz), 7.43 (d, 2H,  $J$  = 8.4 Hz), 7.54 (m, 3H), 7.95 (m, 2H) ppm.  $^{13}\text{C}$  NMR (100 MHz,  $\text{CD}_3\text{OD}$  +  $\text{DMSO-}d_6$ ):  $\delta$  = 21.2, 119.0, 125.5, 127.1, 129.0, 130.6, 131.0, 132.5, 137.6, 159.9, 162.0 ppm. IR (KBr): 3435, 3298, 3044, 2917, 1613, 1581, 1518, 1286, 1244, 1232, 1050, 818, 719, 682  $\text{cm}^{-1}$ .  $\text{C}_{15}\text{H}_{13}\text{N}_3\text{O}$  (251.29): calcd. C 71.70, H 5.21, N 16.72; found C 71.74, H 5.17, N 16.66.

***N*-(2-Fluorophenyl)-5-phenyl-1,3,4-oxadiazol-2-amine (14a)**: White solid; M.p. 120-122 °C.  $^1\text{H}$  NMR (400 MHz,  $\text{CD}_3\text{OD}$ ):  $\delta$  = 7.05 (m, 1H), 7.13-7.20 (m, 2H), 7.49 (m, 3H), 7.93 (m, 2H), 8.09 (t, 1H, 8.0 Hz) ppm.  $^{13}\text{C}$  NMR (100 MHz,  $\text{CD}_3\text{OD}$ ):  $\delta$  = 116.4, 116.6, 121.8, 125.0, 125.1, 125.2, 125.8, 125.9, 127.2, 127.8, 127.9, 130.4, 132.5, 153.1, 155.5, 160.7, 162.0 ppm. IR (KBr): 3391, 3063, 1620, 1581, 1557, 1488, 1461, 1252, 1051, 749, 719, 688

cm<sup>-1</sup>. C<sub>14</sub>H<sub>10</sub>FN<sub>3</sub>O (255.24): calcd. C 65.88, H 3.95, N 16.46; found C 65.83, H 3.99, N 16.41. HRMS (ESI): calcd. for C<sub>14</sub>H<sub>10</sub>FN<sub>3</sub>O (MH<sup>+</sup>) 256.0881; found 256.0883.

***N*-Cyclohexyl-5-phenyl-1,3,4-oxadiazol-2-amine (15a)**: White solid; M.p. 146-148 °C (Lit. M.p. 152.8-152.9 °C).<sup>7</sup> <sup>1</sup>H NMR (400 MHz, CD<sub>3</sub>OD): δ = 1.22-1.48 (m, 5H), 1.66 (m, 1H), 1.81 (m, 2H), 2.07 (m, 2H), 3.49 (m, 1H), 7.49 (m, 3H), 7.87 (m, 2H) ppm <sup>13</sup>C NMR (100 MHz, CD<sub>3</sub>OD): δ = 26.1, 26.8, 34.0, 53.77, 125.6, 126.8, 130.3, 132.1, 159.9, 164.8 ppm. IR (KBr): 3264, 3022, 2919, 2852, 1621, 1586, 1452, 1379, 1346, 1048, 770, 736, 693 cm<sup>-1</sup>. C<sub>14</sub>H<sub>17</sub>N<sub>3</sub>O (243.31): calcd. C 69.11, H 7.04, N 17.27; found C 69.15, H 7.06, N 17.20.

***(R)*-5-Phenyl-*N*-(1-phenylethyl)-1,3,4-oxadiazol-2-amine (16a)**. White solid; M.p. 179-180 °C (Lit. M.p. 181-183 °C).<sup>7</sup> <sup>1</sup>H NMR (400 MHz, CD<sub>3</sub>OD): δ = 1.58 (d, 3H, *J* = 6.8 Hz), 4.94 (m, 1H), 7.25 (m, 1H), 7.35 (t, 2H, *J* = 8.0 Hz), 7.42 (m, 2H), 7.49 (m, 3H), 7.85 (m, 2H) ppm. <sup>13</sup>C NMR (100 MHz, CD<sub>3</sub>OD): δ = 23.6, 54.6, 125.5, 126.9, 127.2, 128.6, 129.8, 130.3, 132.2, 142.7, 145.2, 164.7 ppm. IR (KBr): 3231, 3036, 2976, 2936, 1614, 1494, 1256, 1127, 1048, 700, 691 cm<sup>-1</sup>. C<sub>16</sub>H<sub>15</sub>N<sub>3</sub>O (265.31): calcd. C 72.43, H 5.70, N 15.84; found C 72.39, H 5.73, N 15.77. HRMS (ESI): calcd. for C<sub>16</sub>H<sub>15</sub>N<sub>3</sub>O (MH<sup>+</sup>) 266.1288; found 266.1293.

## References:

- 1 SMART, SAINT and XPREP, Siemens Analytical X-ray Instruments Inc., Madison, Wisconsin.
- 2 G. M. Sheldrick, *SADABS: Empirical Absorption and Correction Software*, University of Gottingen, Institut für Anorganische Chemie der Universität, Tammanstrasse 4, D-3400 Gottingen, Germany, 1999–2003.
- 3 G. M. Sheldrick, *SHELXS-97*, University of Gottingen, Germany, 1997.
- 4 G. Werber, *J. Heterocycl. Chem.*, 1977, **14**, 1385.
- 5 Y. Xie, J. Liu, P. Yang, X. Shi and J. Li, *Tetrahedron*, 2011, **67**, 5369.
- 6 E. L. P. Chekler, H. M. Elokda and J. Butera, *Tetrahedron Lett.*, 2008, **49**, 6709.
- 7 C. G. Levins and Z. -K. Wan, *Org. Lett.*, 2008, **10**, 1755.

## SPECTRA

### *N*-Phenyl-1,3,4-oxadiazol-2-amine (1a): $^1\text{H}$ NMR ( $\text{CD}_3\text{OD}$ , 400 MHz)

```
exptl std1h
SAMPLE
date Dec 21 2010 temp not used
solvent CD3OD gain not used
file exp spin not used
ACQUISITION hst 0.000
sw 8006.0 pw90 19.700
at 1.995 alfa 20.000
np 23964 FLAGS
fb not used i1 n
bs 4 in n
dl 1.000 dp y
nt 32 hs nn
ct
TRANSMITTER 32 fn PROCESSING
tn H1 fn not used
sfrq 399.855 sp DISPLAY
tof 0 wp 6000.0
tpwr 57 rfl 2207.6
pw 7.000 rfp 1323.5
DECOUPLER C13 rp 103.2
dn 0 lp -68.4
dof 0 PLOT
dm nnn wc 250
des c cc 0
dpwr 50 vs 45
def 15900 th 29
nm cdc ph
```

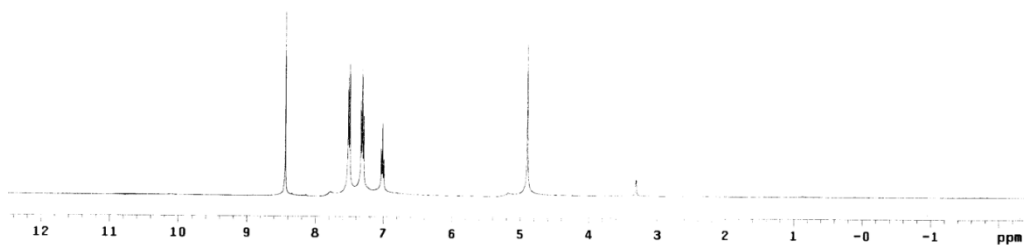

### *N*-Phenyl-1,3,4-oxadiazol-2-amine (1a): $^{13}\text{C}$ NMR ( $\text{CD}_3\text{OD}$ , 100 MHz)

```
exptl std13c
SAMPLE
date Dec 21 2010 temp not used
solvent CD3OD gain not used
file exp spin not used
ACQUISITION hst 0.000
sw 25000.0 pw90 10.000
at 1.199 alfa 20.000
np 59960 FLAGS
fb 13800 i1 n
bs 64 in n
dl 0 dp y
nt 5000 hs nn
ct
TRANSMITTER 1b PROCESSING 1.00
tn C13 fn not used
sfrq 100.623 sp DISPLAY
tof 0 wp -2843.1
tpwr 81 wp 25000.0
pw 8.567 rfl 2768.3
DECOUPLER H1 rfp 4946.7
dn 0 lp -12.1
dof 0 lp -366.2
dm yyy PLOT
des v wc 250
dpwr 42 sc 0
def 8000 vs 76
th 1
nm no ph
```

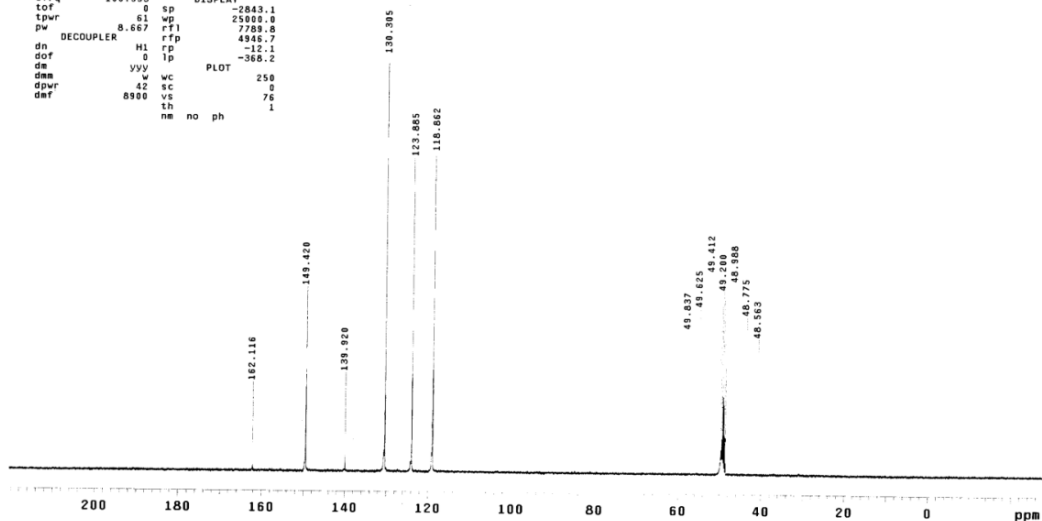



*N-p*-Tolyl-1,3,4-oxadiazol-2-amine (2a):  $^1\text{H}$  NMR ( $\text{CD}_3\text{OD}$ , 400 MHz)

```
exp1 s2pu1
SAMPLE
date Jan 19 2011 temp not used
solvent CD300 gain not used
file exp spin not used
ACQUISITION hst 8.888
sv 6389.8 pwsa 13.765
at 1.980 alfa 20.000
np 25528
fb not used i1 n
bs 4 in n
d1 1.000 dp y
nt 32 hs nn
ct 32
TRANSMITTER lb 0.10
tn H1 fn 65536
sfrq 399.855 DISPLAY
tof 362.7 sp -239.3
tpwr 57 wp 4433.3
pw 9.850 rfl 2116.8
DECOUPLER C13 rfp 1923.5
dn 0 lp 198.9
dof nm 0 ip -88.2
dm v wc PLOT 250
dpr 42 sc 0
dat 15900 vs 53
nm cdc ph 20
```

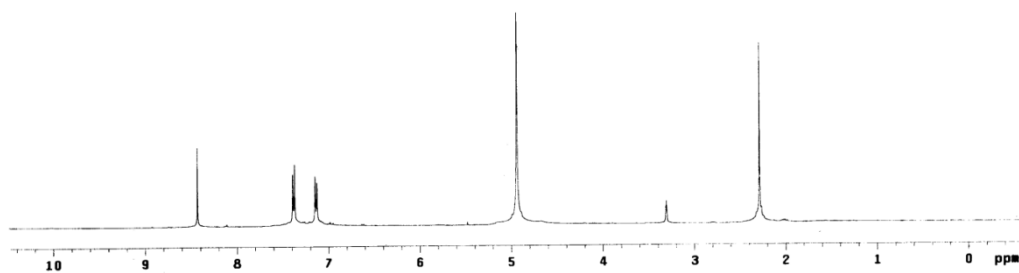

*N-p*-Tolyl-1,3,4-oxadiazol-2-amine (2a):  $^{13}\text{C}$  NMR ( $\text{CD}_3\text{OD}$ , 100 MHz)

```
exp1 s2pu1
SAMPLE
date Jan 19 2011 temp not used
solvent CD300 gain not used
file exp spin not used
ACQUISITION hst 8.888
sv 25125.6 pwsa 16.800
at 1.199 alfa 20.000
np 68270
fb 13688 i1 n
bs 32 in n
d1 1.000 dp y
nt 5000 hs nn
ct 1568
TRANSMITTER lb 2.00
tn C13 fn 65536
sfrq 100.624 DISPLAY
tof 1536.3 sp -739.1
tpwr 61 wp 20898.0
pw 9.300 rfl 6313.8
DECOUPLER H1 rfp 4846.7
dn 8 lp -19.3
dof v yyy PLOT 250
dm v wc 86
dpr 8900 vs 2
dat th no ph
```

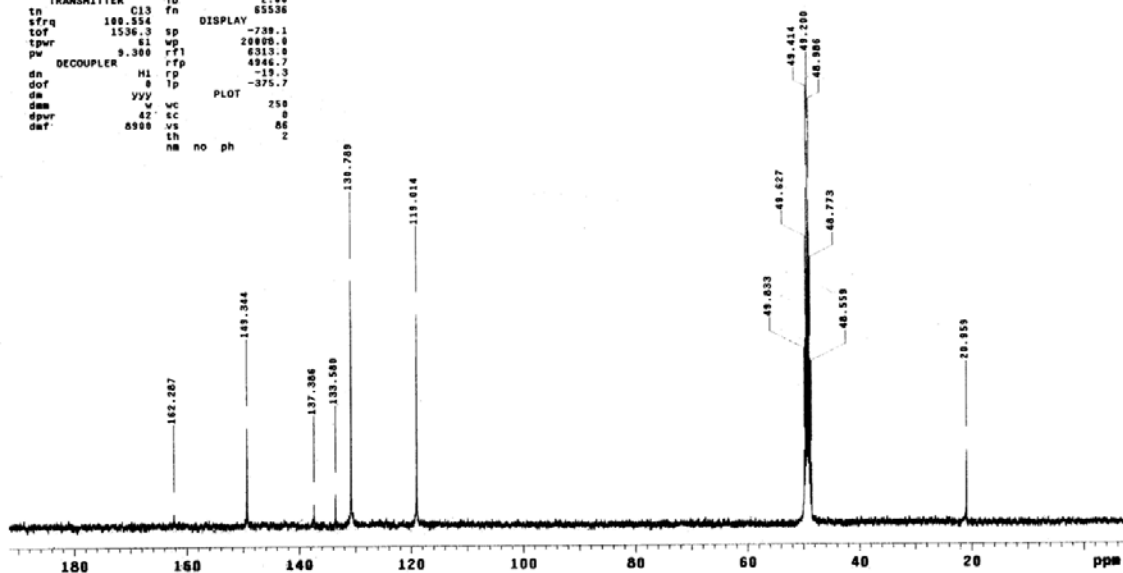

*N*-(2-Methoxyphenyl)-1,3,4-oxadiazol-2-amine (3a):  $^1\text{H}$  NMR ( $\text{CD}_3\text{OD}$ , 400 MHz)

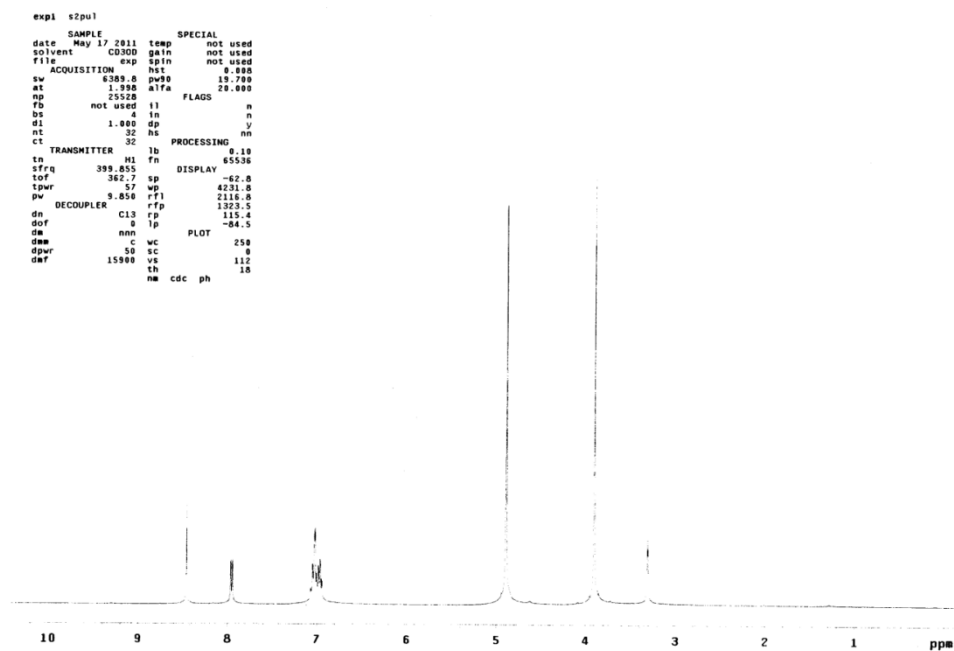

*N*-(2-Methoxyphenyl)-1,3,4-oxadiazol-2-amine (3a):  $^{13}\text{C}$  NMR ( $\text{CD}_3\text{OD}$ , 100 MHz)

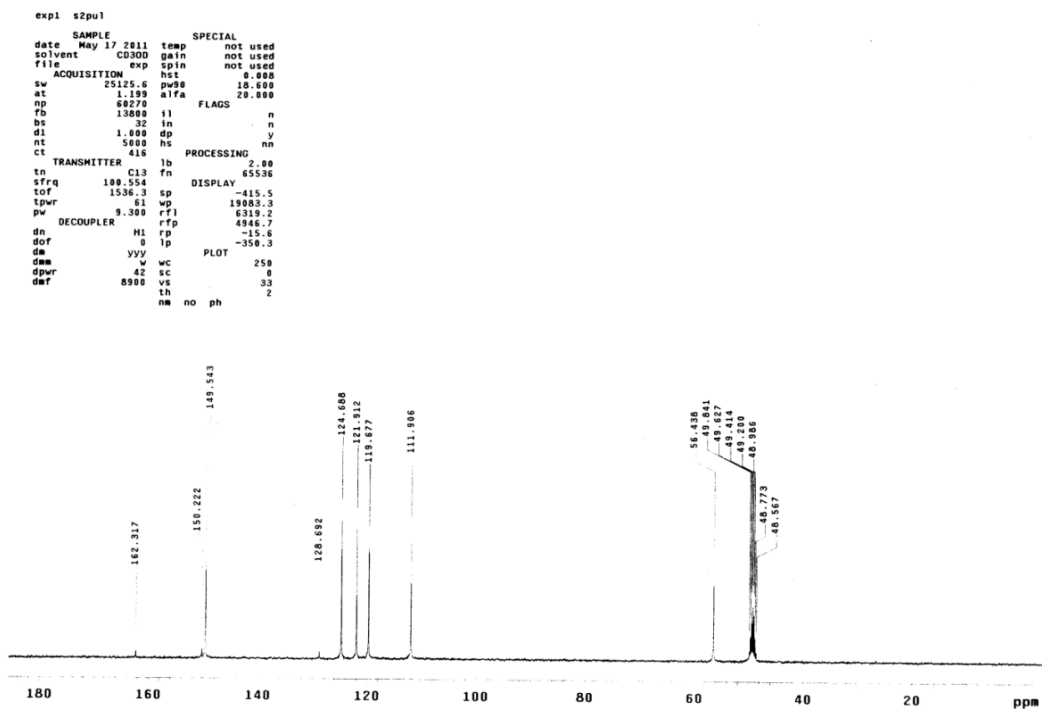

*N*-(4-Methoxyphenyl)-1,3,4-oxadiazol-2-amine (4a):  $^1\text{H}$  NMR ( $\text{CD}_3\text{OD}$ , 400 MHz)

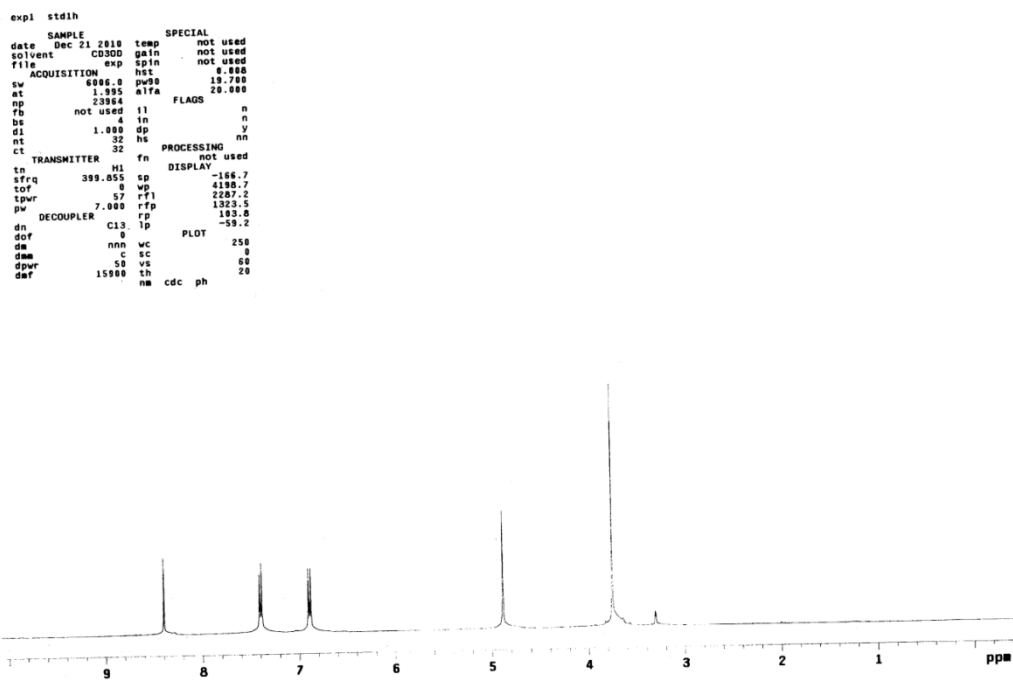

*N*-(4-Methoxyphenyl)-1,3,4-oxadiazol-2-amine (4a):  $^{13}\text{C}$  NMR ( $\text{CD}_3\text{OD}$ , 100 MHz)

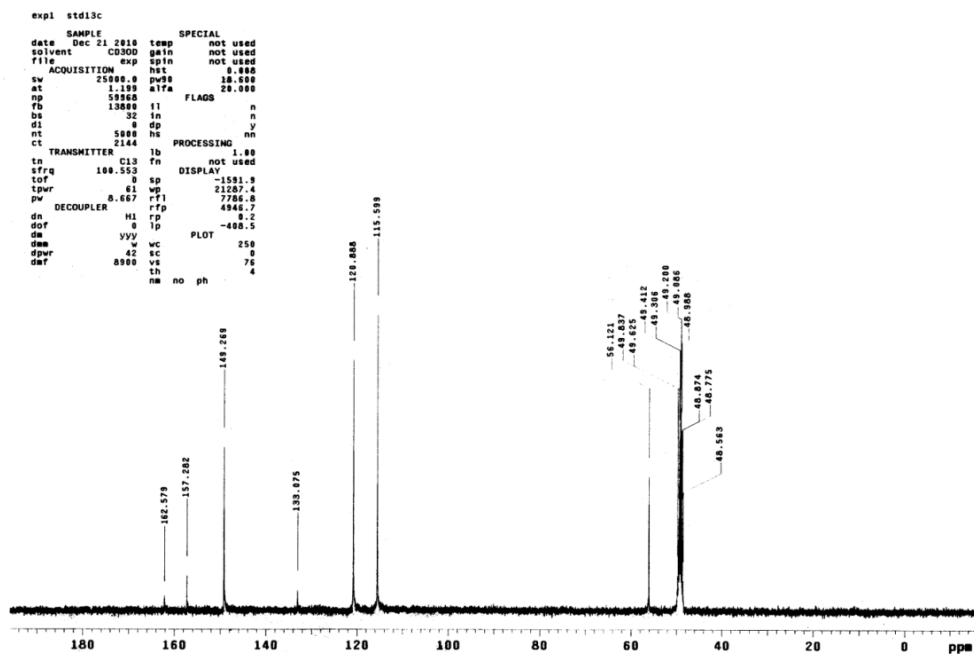

***N*-(3,4-Dimethylphenyl)-1,3,4-oxadiazol-2-amine (5a): <sup>1</sup>H NMR (CD<sub>3</sub>OD, 400 MHz)**

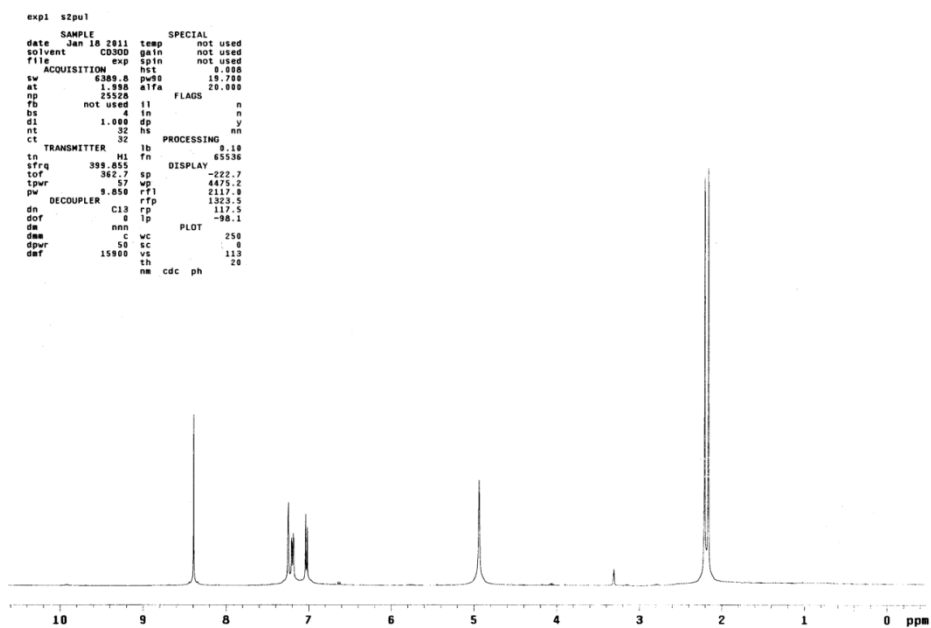

***N*-(3,4-Dimethylphenyl)-1,3,4-oxadiazol-2-amine (5a): <sup>13</sup>C NMR (CD<sub>3</sub>OD, 100 MHz)**

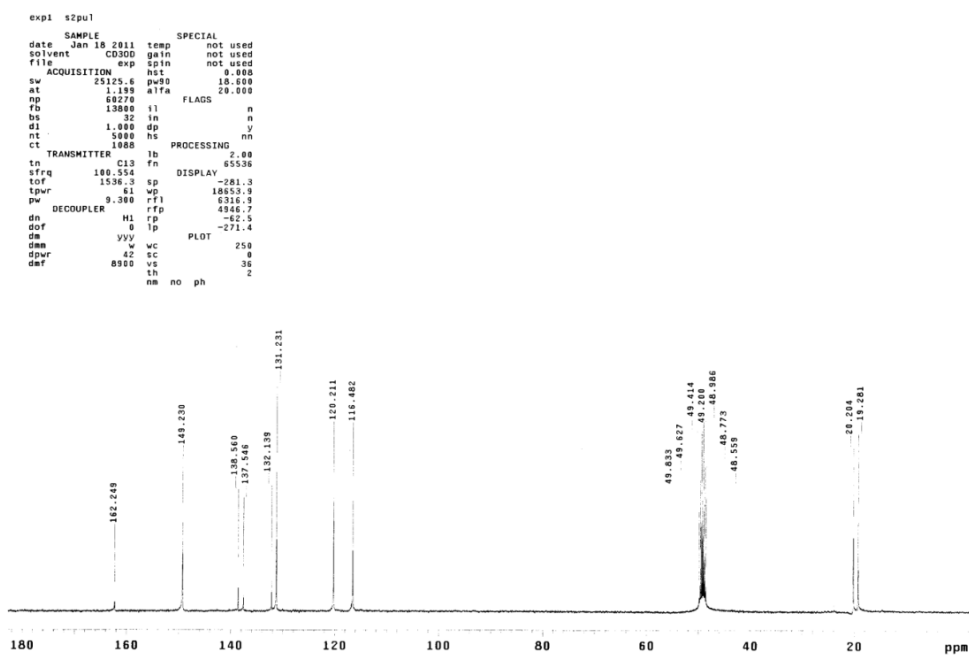

*N*-(2-Chlorophenyl)-1,3,4-oxadiazol-2-amine (6a):  $^1\text{H}$  NMR ( $\text{CD}_3\text{OD}$ , 400 MHz)

```
exp1 szpu1
SAMPLE
date Jan 19 2011 temp not used
solvent CD3OD gain not used
file ACQUISITION exp spin not used
sw 6389.8 pu98 19.700
at 1.950 a1fa 28.488
np 25528 FLAGS n
fb not used i1 n
bs not used i1 n
d1 1.000 dp y
nt 32 hs nn
ct TRANSMITTER 32 PROCESSING 8.10
tn H1 fn 65536
sfrq 399.855 DISPLAY -137.9
tof 362.7 sp 4282.1
tpwr 9.850 rF1 2116.2
pw DECOUPLER C13 rfp 1323.5
dn H1 rp 123.7
dof 0 lp -88.5
dm nnn PLOT 250
dms c wc 0
dpr 15800 vs 0
drt nm th 20
nm cdc ph
```

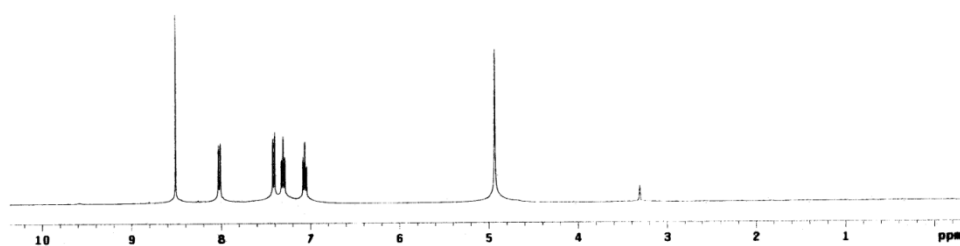

*N*-(2-Chlorophenyl)-1,3,4-oxadiazol-2-amine (6a):  $^{13}\text{C}$  NMR ( $\text{CD}_3\text{OD}$ , 100 MHz)

```
exp1 szpu1
SAMPLE
date Jan 19 2011 temp not used
solvent CD3OD gain not used
file ACQUISITION exp spin not used
sw 25123.6 pu98 18.800
at 1.159 a1fa 28.488
np 68270 FLAGS n
fb 13000 i1 n
bs 32 i1 n
d1 1.000 dp y
nt 5000 hs nn
ct TRANSMITTER 1668 PROCESSING 2.00
tn C13 fn 65536
sfrq 100.624 DISPLAY -512.9
tof 1536.3 sp 19883.3
tpwr 9.300 rF1 6317.6
pw DECOUPLER H1 rfp 4946.7
dn H1 rp 36.5
dof 0 lp -375.3
dm vvv PLOT 250
dms c wc 0
dpr 8900 vs 33
drt nm th 2
nm no ph
```

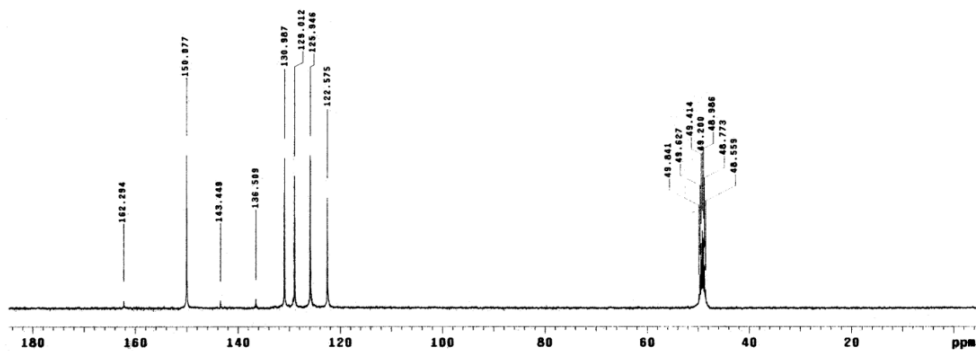

*N*-(3-Chlorophenyl)-1,3,4-oxadiazol-2-amine (7a): <sup>1</sup>H NMR (CD<sub>3</sub>OD, 400 MHz)

```
exp1 s2pul
SAMPLE
date Jan 7 2011 temp SPECIAL
solvent CD300 gain not used
file exp spin not used
ACQUISITION hst 0.000
sw 6360.0 pw90 13.700
at 1.990 a1Fa 20.000
np 25520 FLAGS n
fb not used i1 n
bs 32 in n
d1 1.000 dp y
nt 32 hs nm
ct
TRANSMITTER 32 PROCESSING 0.10
tn H1 fn 65536
sfrq 300.855 DISPLAY 65536
tof 362.7 sp -163.0
tpwr 57 wp 6315.7
pw 9.050 rF1 2116.2
DECOUPLER rFp 1323.5
dn C13 rFp 130.0
dof 0 lp -100.0
dm nnn PLOT
dwm c wc 250
dpr 50 sc 0
daf 15000 vs 37
nm cdc ph 20
```

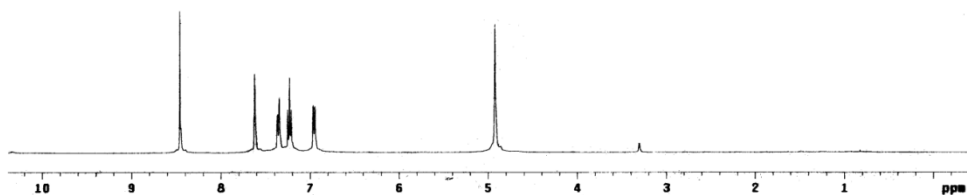

*N*-(3-Chlorophenyl)-1,3,4-oxadiazol-2-amine (7a): <sup>13</sup>C NMR (CD<sub>3</sub>OD, 100 MHz)

```
exp1 s2pul
SAMPLE
date Jan 7 2011 temp SPECIAL
solvent CD300 gain not used
file exp spin not used
ACQUISITION hst 0.000
sw 25125.6 pw90 10.000
at 1.190 a1Fa 20.000
np 60270 FLAGS n
fb 13000 i1 n
bs 32 in n
d1 1.000 dp y
nt 5000 hs nm
ct
TRANSMITTER 544 PROCESSING 2.00
tn C13 fn 65536
sfrq 100.554 DISPLAY 65536
tof 1536.3 sp -1374.0
tpwr 61 wp 25125.6
pw 9.300 rF1 6320.7
DECOUPLER rFp 4946.7
dn H1 rFp 17.4
dof 0 lp -420.3
dm yyy PLOT
dwm c wc 250
dpr 42 sc 0
daf 8900 vs 30
nm no ph 2
```

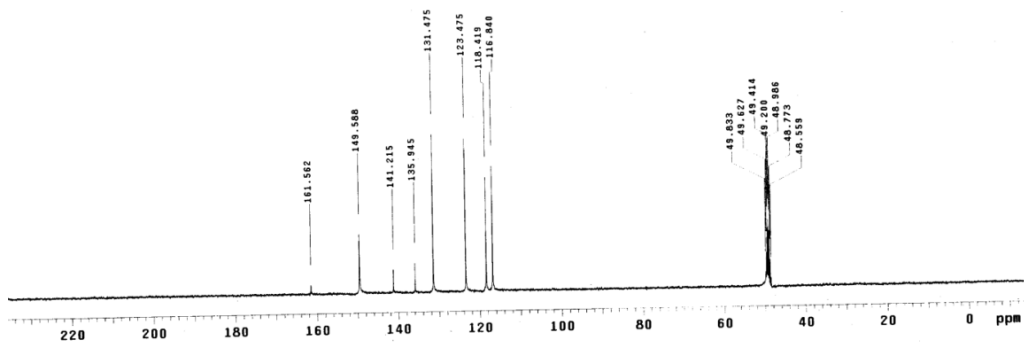

### *N*-(3-Chlorophenyl)-1,3,4-oxadiazol-2-amine (7a): (Mass Spectra)

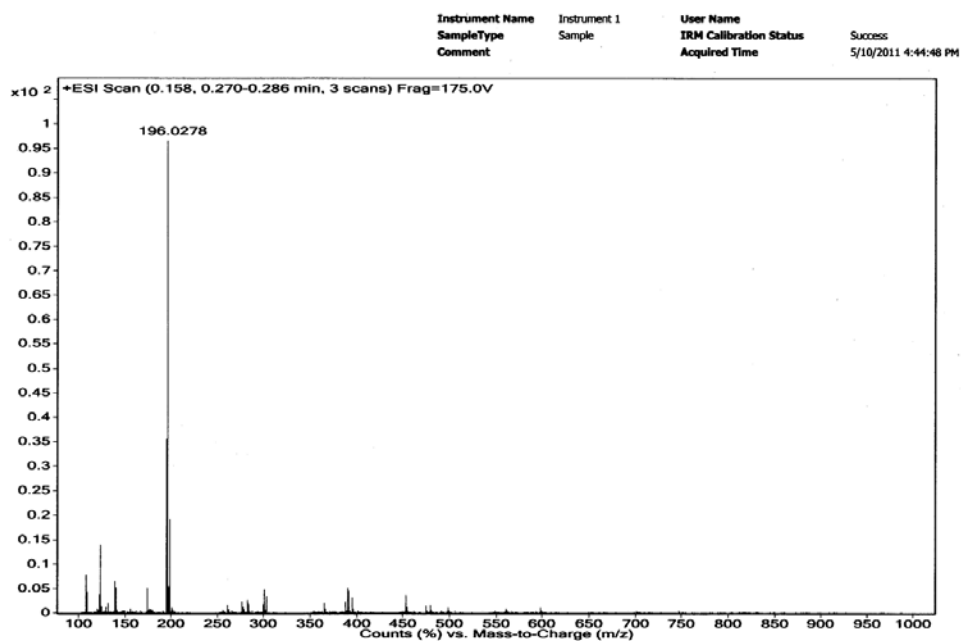

### *N*-(4-Bromophenyl)-1,3,4-oxadiazol-2-amine (8a): <sup>1</sup>H NMR (CD<sub>3</sub>OD, 400 MHz)

```
expl stdih
SAMPLE
date Dec 21 2010 temp SPECIAL not used
solvent CD300 gain not used
file exp spin not used
ACQUISITION hst 0.000
sw 6000.0 pw90 13.700
at 1.995 altfa 20.000
np 23964 FLAGS n
fb not used i1 n
bs 4 in n
d1 1.000 dp y
nt 32 hs nn
ct 32 fn PROCESSING nn
TRANSMITTER H1 not used
tn 399.855 sp DISPLAY -112.1
tof 0 wp 3930.0
tpwr 57 rfl 2287.0
pw 7.000 rfp 1323.5
DECOUPLER C13 rp 112.0
dn 0 lp -81.2
dof 0 nnn wc PLOT 250
dm c sc 0
dpr 50 vs 73
dprf 15900 tn 20
dpr nm cdc ph
```

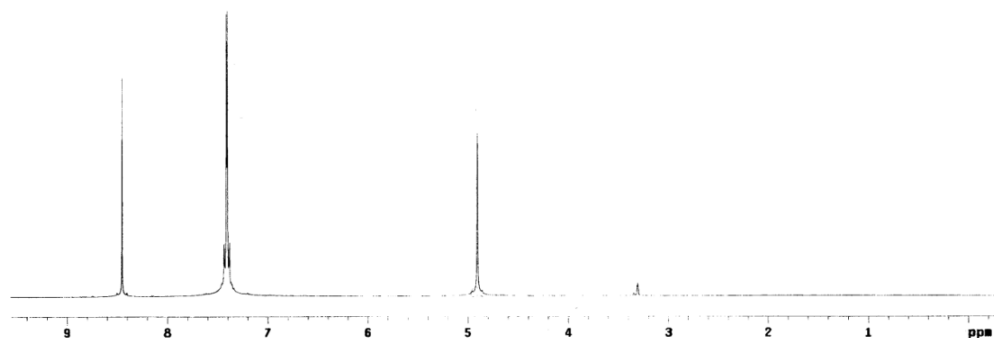

***N*-(4-Bromophenyl)-1,3,4-oxadiazol-2-amine (8a): <sup>13</sup>C NMR (CD<sub>3</sub>OD, 100 MHz)**

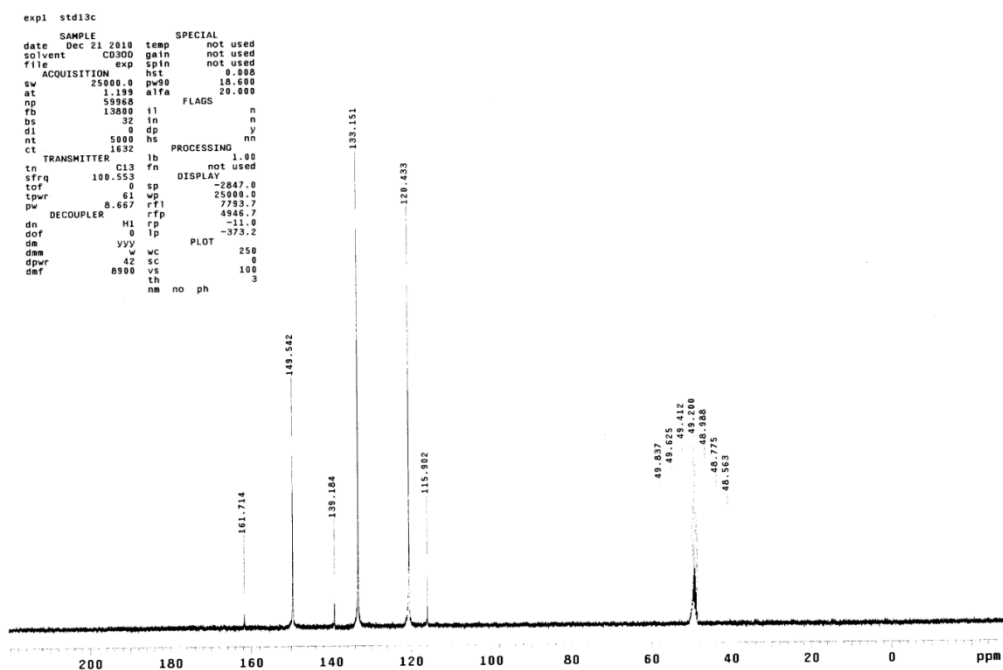

***N*-(3-Nitrophenyl)-1,3,4-oxadiazol-2-amine (9a): <sup>1</sup>H NMR (CD<sub>3</sub>OD, 400 MHz)**

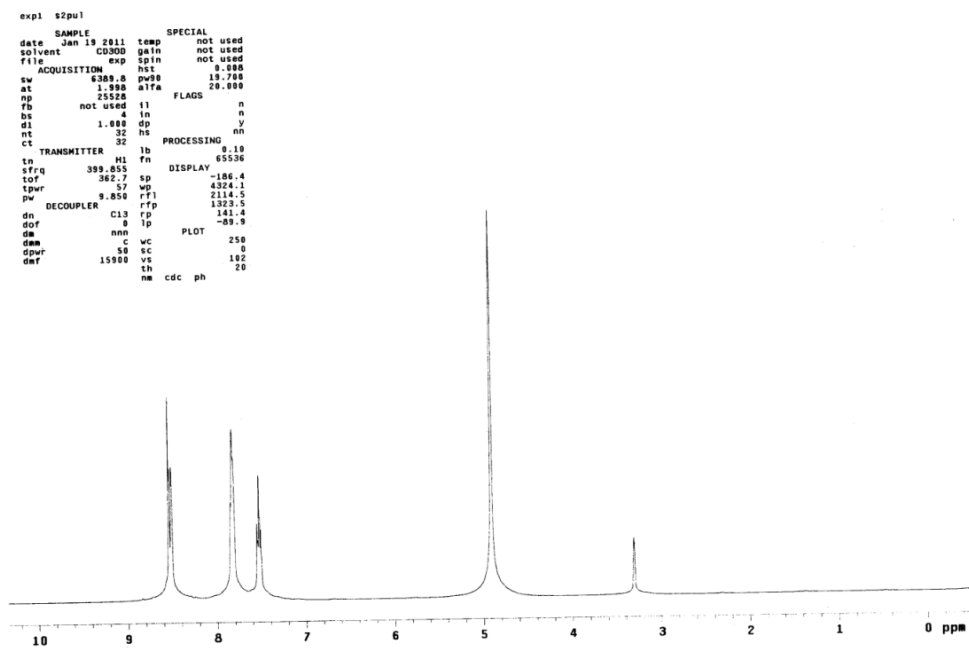



*N*-(3-Nitrophenyl)-1,3,4-oxadiazol-2-amine (9a):  $^{13}\text{C}$  NMR ( $\text{CD}_3\text{OD}$ , 100 MHz)

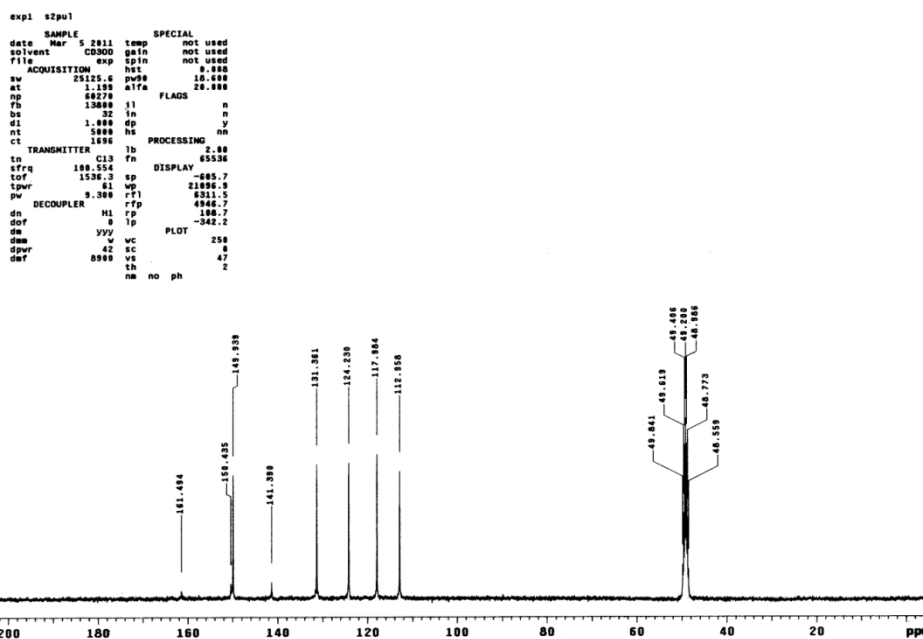

*N*-(3-Nitrophenyl)-1,3,4-oxadiazol-2-amine (9a): (Mass Spectra)

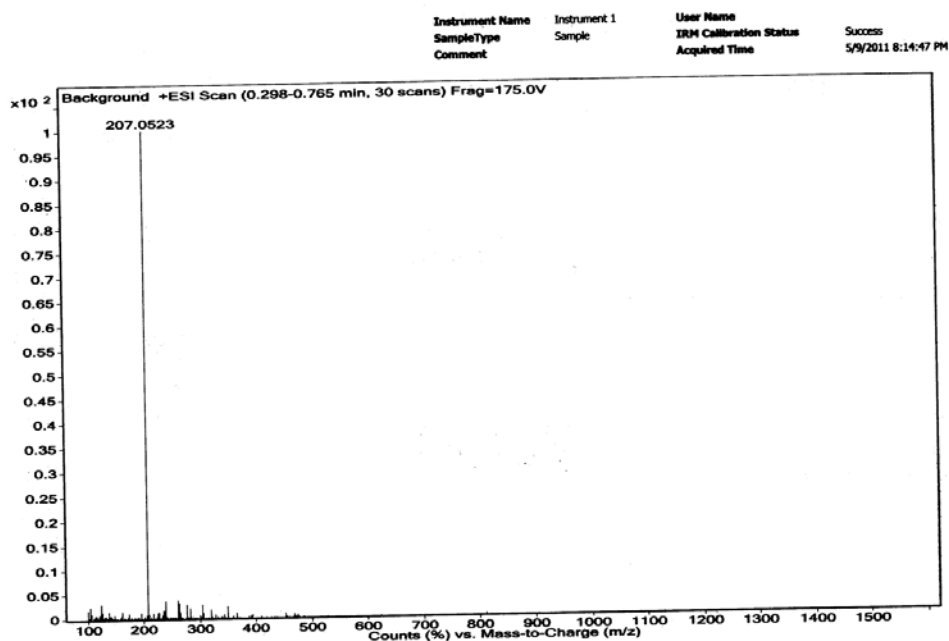

*N*-(4-(Trifluoromethyl)phenyl)-1,3,4-oxadiazol-2-amine (10a): <sup>1</sup>H NMR (CD<sub>3</sub>OD, 400 MHz)

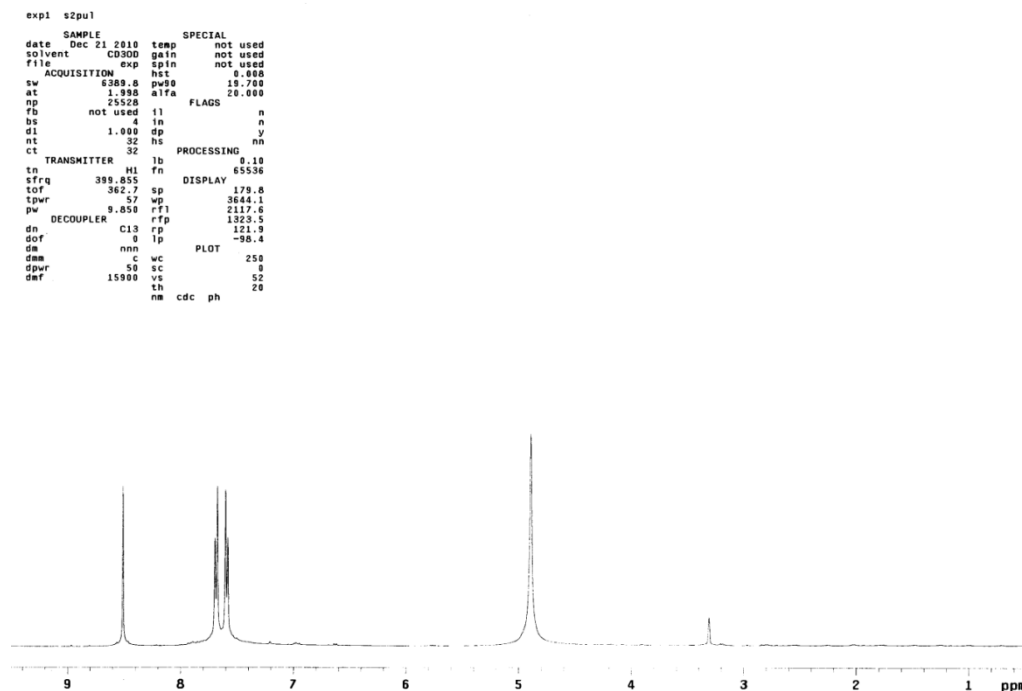

*N*-(4-(Trifluoromethyl)phenyl)-1,3,4-oxadiazol-2-amine (10a): <sup>13</sup>C NMR (CD<sub>3</sub>OD, 100 MHz)

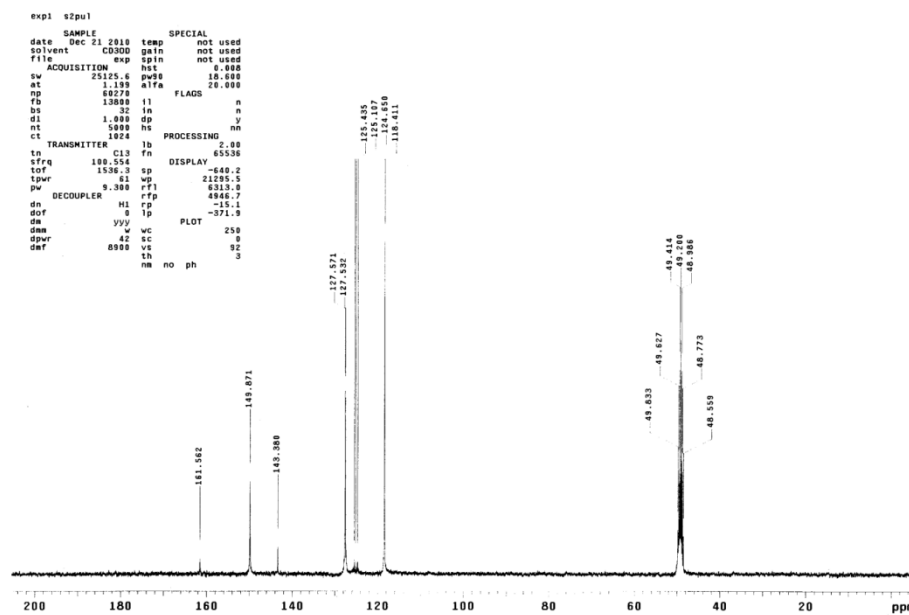

### *N*-(4-(Trifluoromethyl)phenyl)-1,3,4-oxadiazol-2-amine (10a): (Mass Spectra)

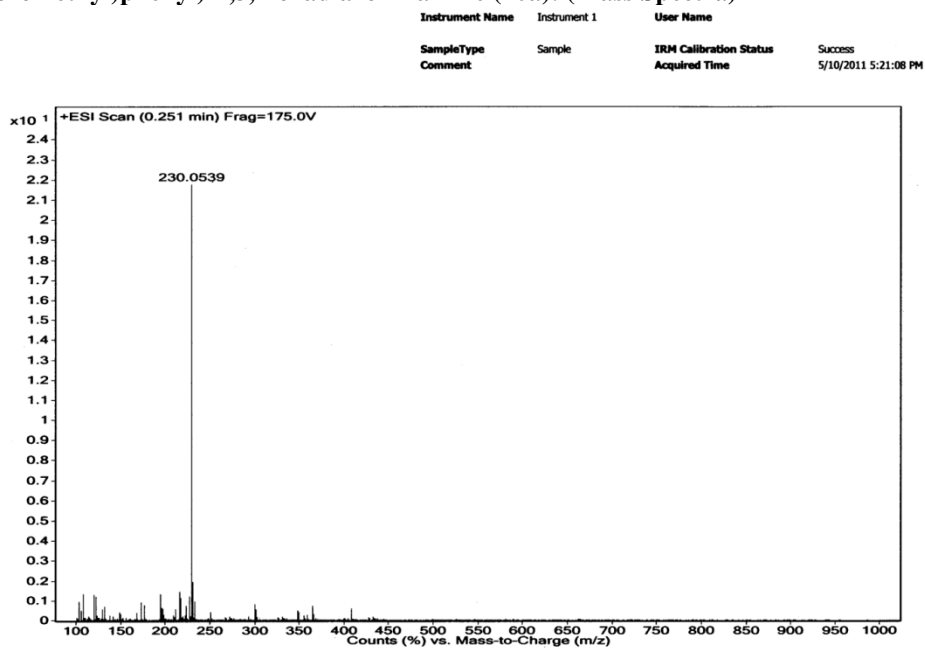

### *N*-(Naphthalen-1-yl)-1,3,4-oxadiazol-2-amine (11a): <sup>1</sup>H NMR (CD<sub>3</sub>OD, 400 MHz)

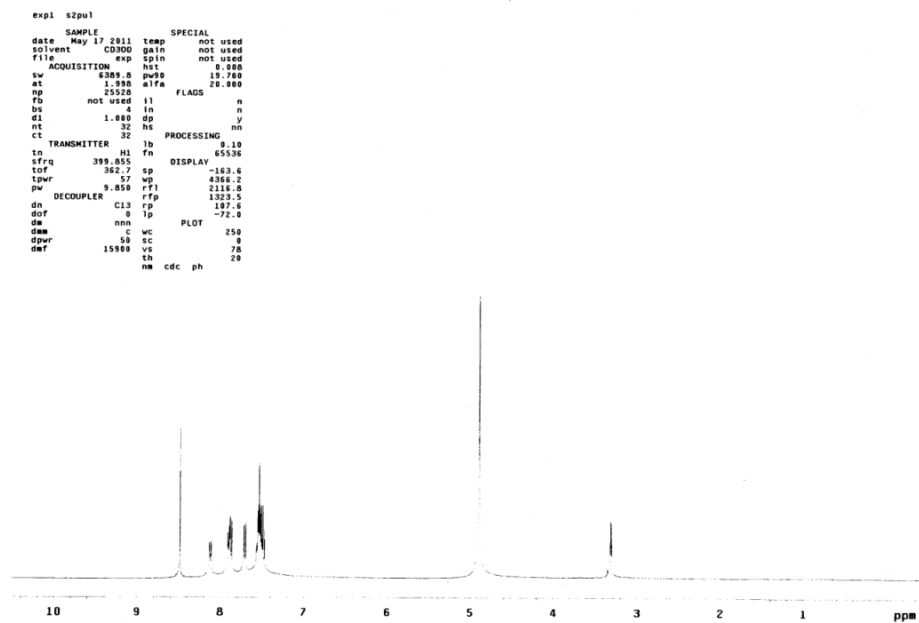

*N*-(Naphthalen-1-yl)-1,3,4-oxadiazol-2-amine (11a):  $^{13}\text{C}$  NMR ( $\text{CD}_3\text{OD}$ , 100 MHz)

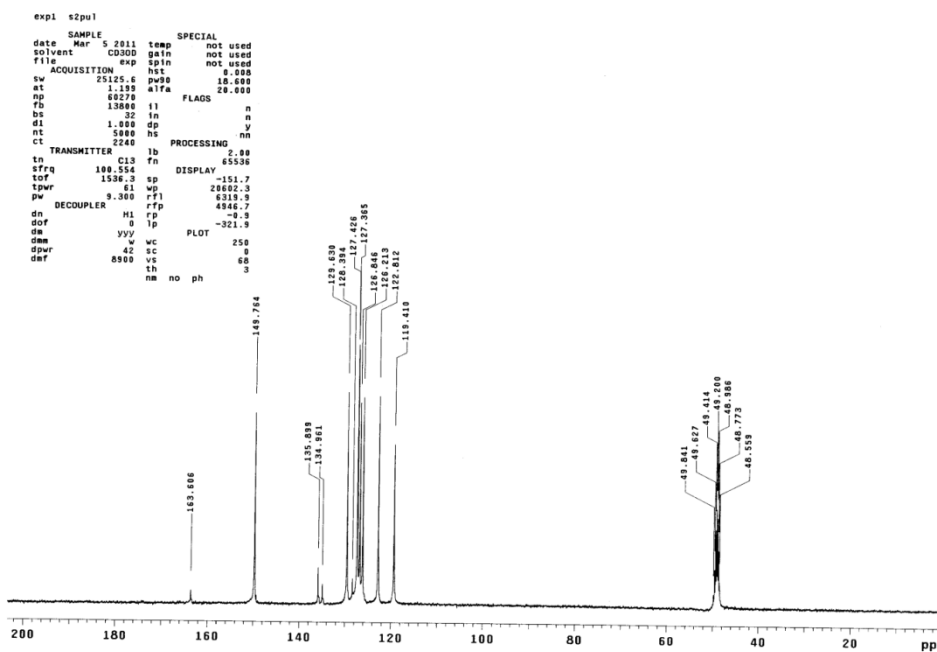

*N*-(Naphthalen-1-yl)-1,3,4-oxadiazol-2-amine (11a): (Mass Spectra)

| Instrument Name | Instrument 1 | User Name              |
|-----------------|--------------|------------------------|
| SampleType      | Sample       | IRM Calibration Status |
| Comment         |              | Acquired Time          |

Success  
5/10/2011 5:14:42 PM

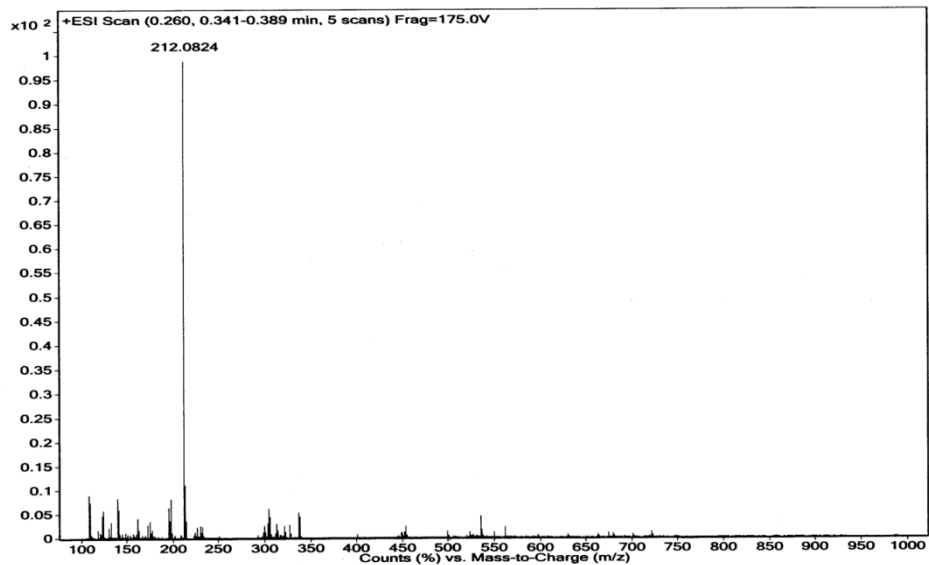

***N*,5-Diphenyl-1,3,4-oxadiazol-2-amine (12a): <sup>1</sup>H NMR (CD<sub>3</sub>OD, 400 MHz)**

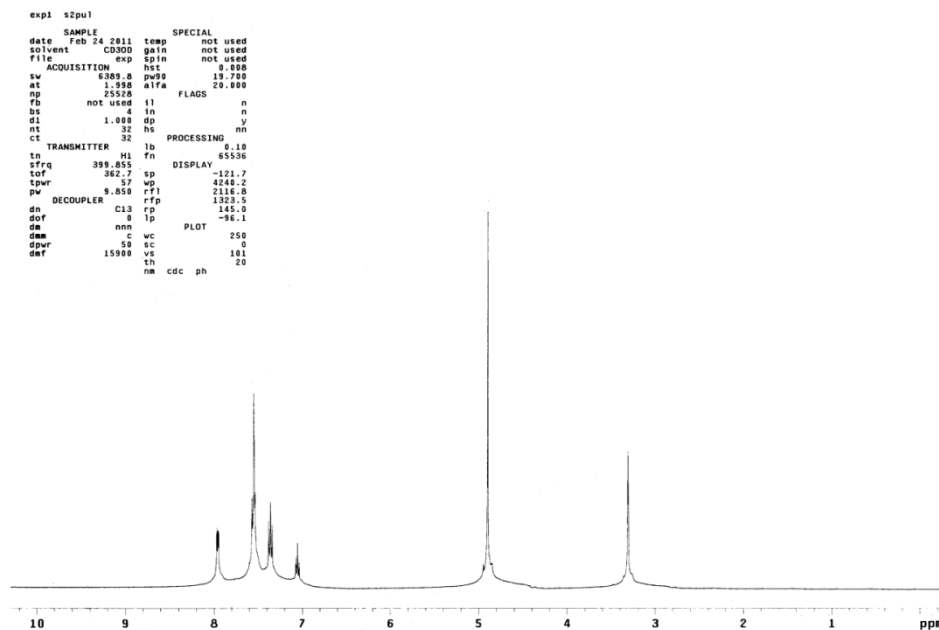

***N*,5-Diphenyl-1,3,4-oxadiazol-2-amine (12a): <sup>13</sup>C NMR (CD<sub>3</sub>OD + DMSO-*d*<sub>6</sub>, 100 MHz)**

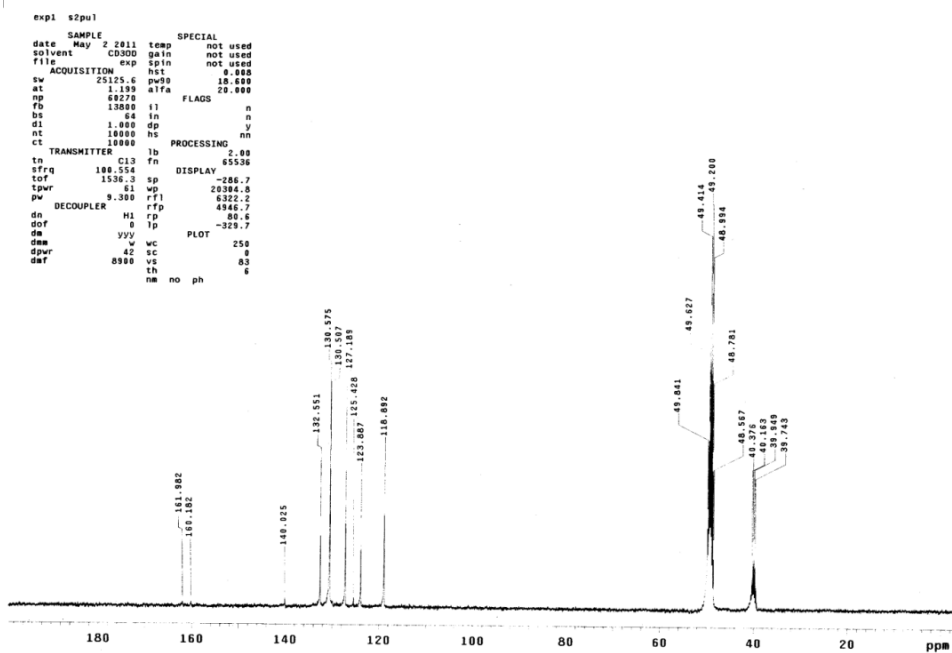

### N,5-Diphenyl-1,3,4-oxadiazol-2-amine (12a): (Mass Spectra)

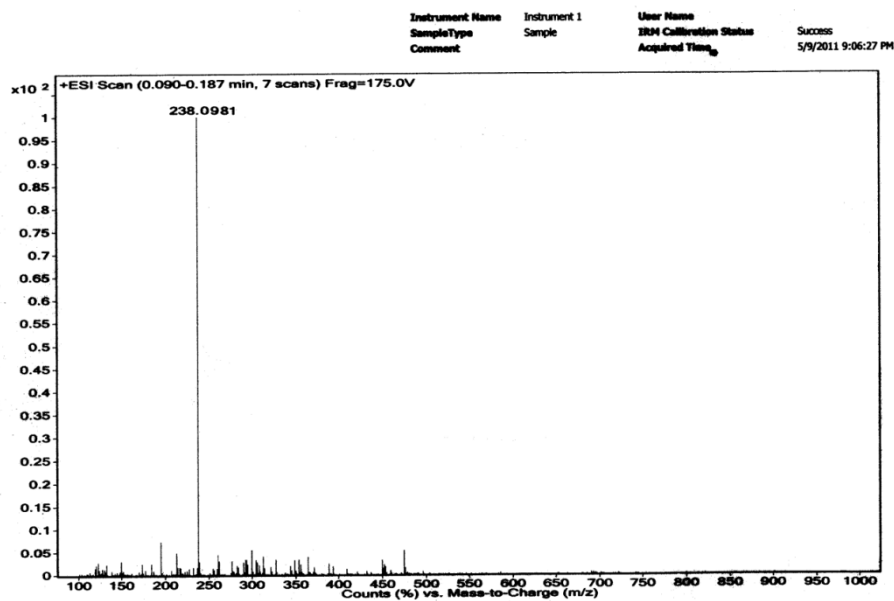

### 5-Phenyl-N-p-tolyl-1,3,4-oxadiazol-2-amine (13a): <sup>1</sup>H NMR (CD<sub>3</sub>OD, 400 MHz)

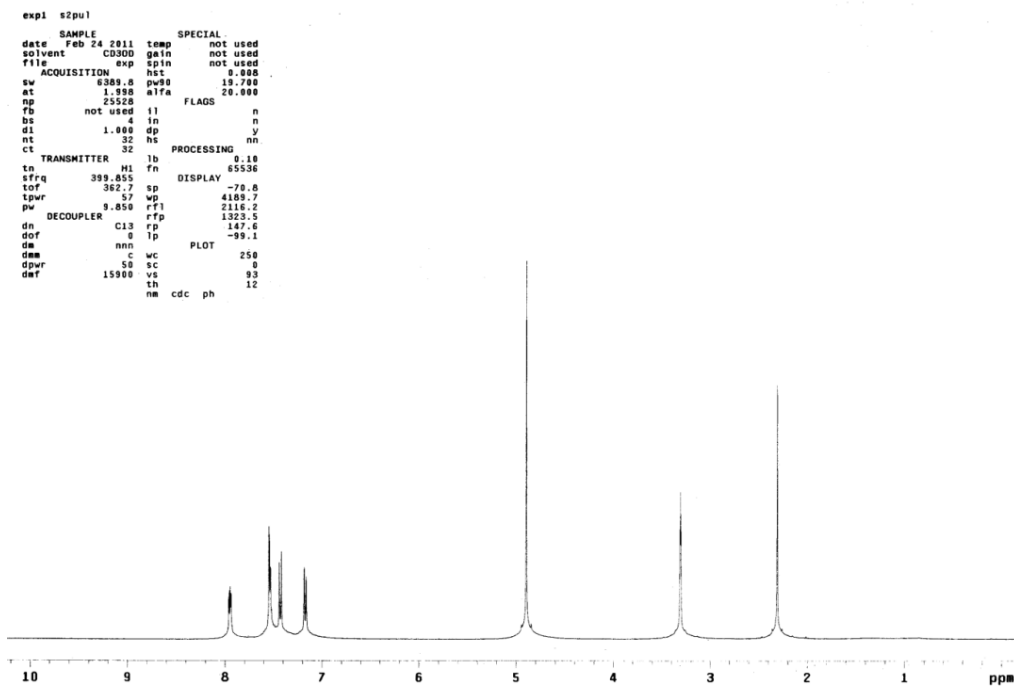

5-Phenyl-*N-p*-tolyl-1,3,4-oxadiazol-2-amine (13a):  $^{13}\text{C}$  NMR ( $\text{CD}_3\text{OD} + \text{DMSO-}d_6$ , 100 MHz)

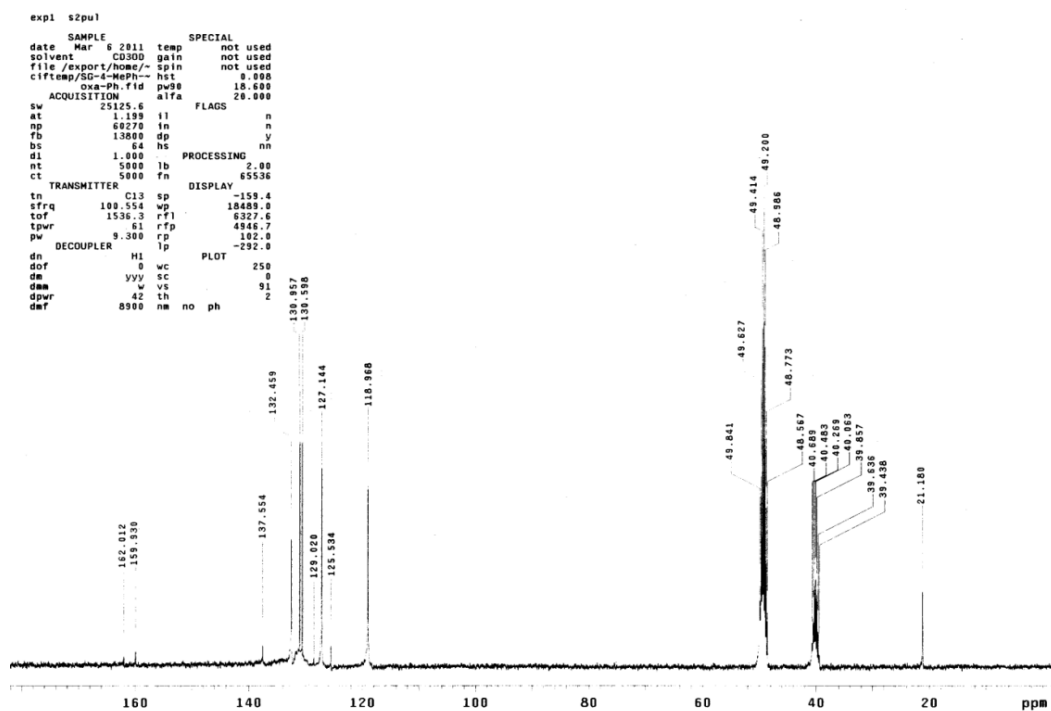

*N*-(2-Fluorophenyl)-5-phenyl-1,3,4-oxadiazol-2-amine (14a):  $^1\text{H}$  NMR ( $\text{CD}_3\text{OD}$ , 400 MHz)

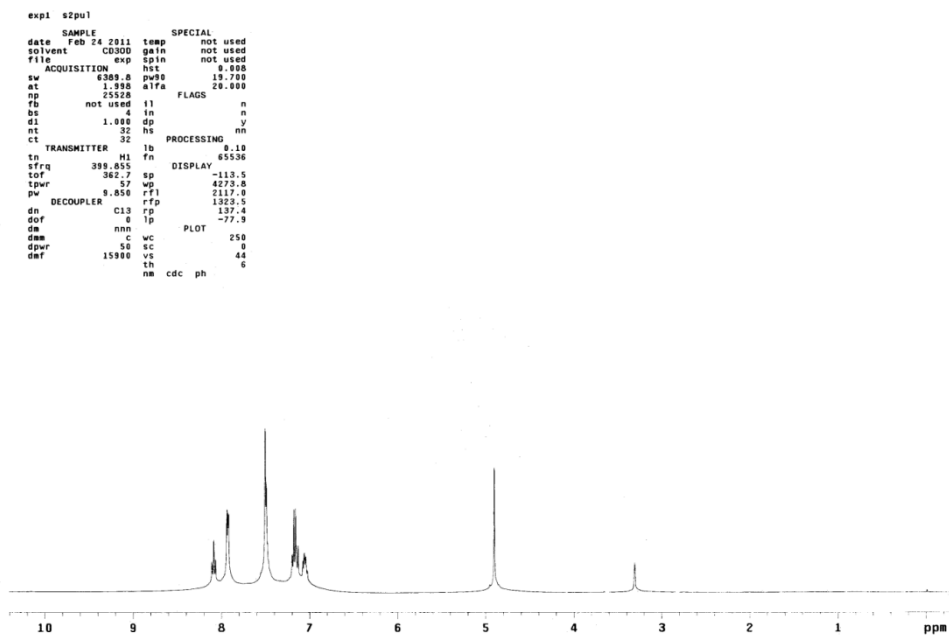

***N*-(2-Fluorophenyl)-5-phenyl-1,3,4-oxadiazol-2-amine (14a):  $^{13}\text{C}$  NMR ( $\text{CD}_3\text{OD}$ , 100 MHz)**

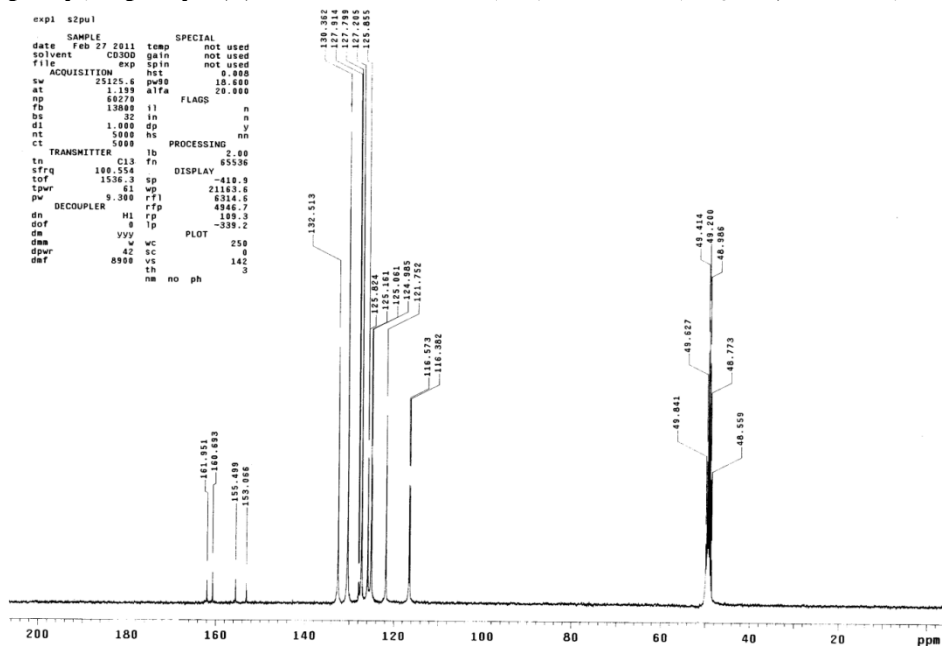

***N*-(2-Fluorophenyl)-5-phenyl-1,3,4-oxadiazol-2-amine (14a): (Mass Spectra)**

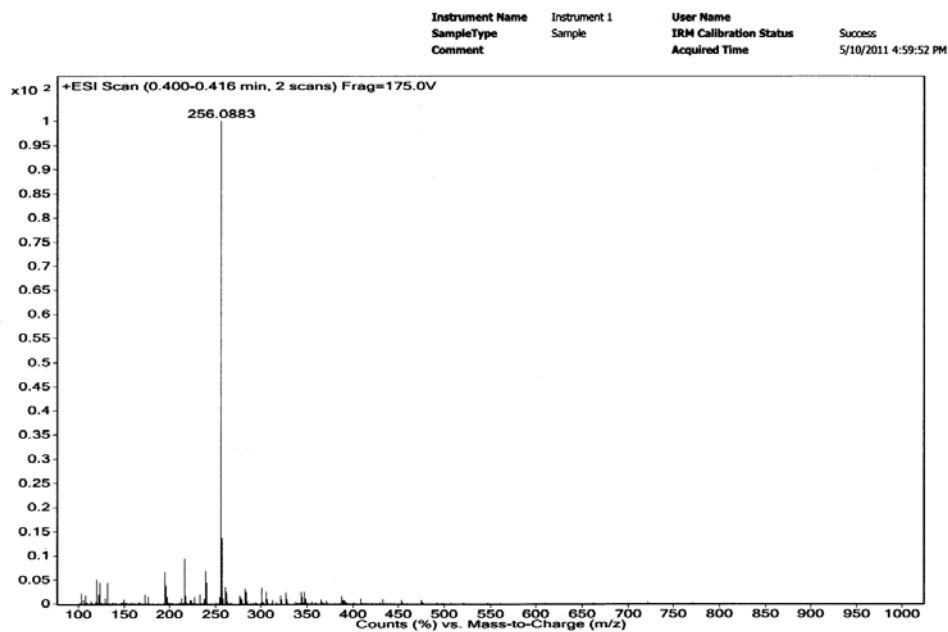



*N*-Cyclohexyl-5-phenyl-1,3,4-oxadiazol-2-amine (15a): <sup>1</sup>H NMR (CD<sub>3</sub>OD, 400 MHz)

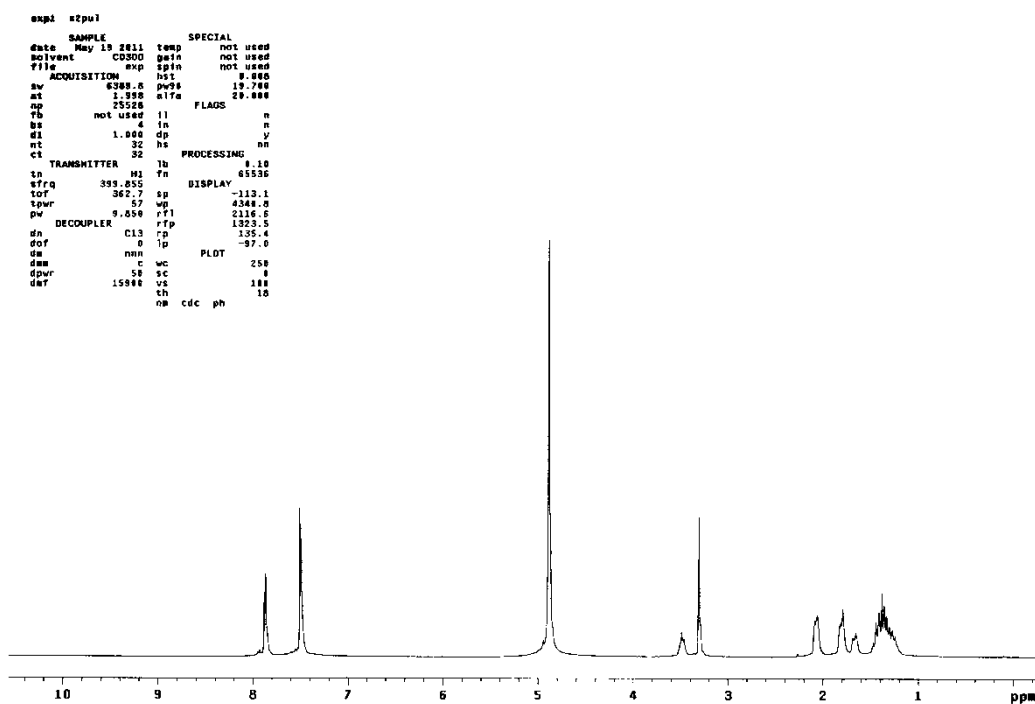

*N*-Cyclohexyl-5-phenyl-1,3,4-oxadiazol-2-amine (15a): <sup>13</sup>C NMR (CD<sub>3</sub>OD, 100 MHz)

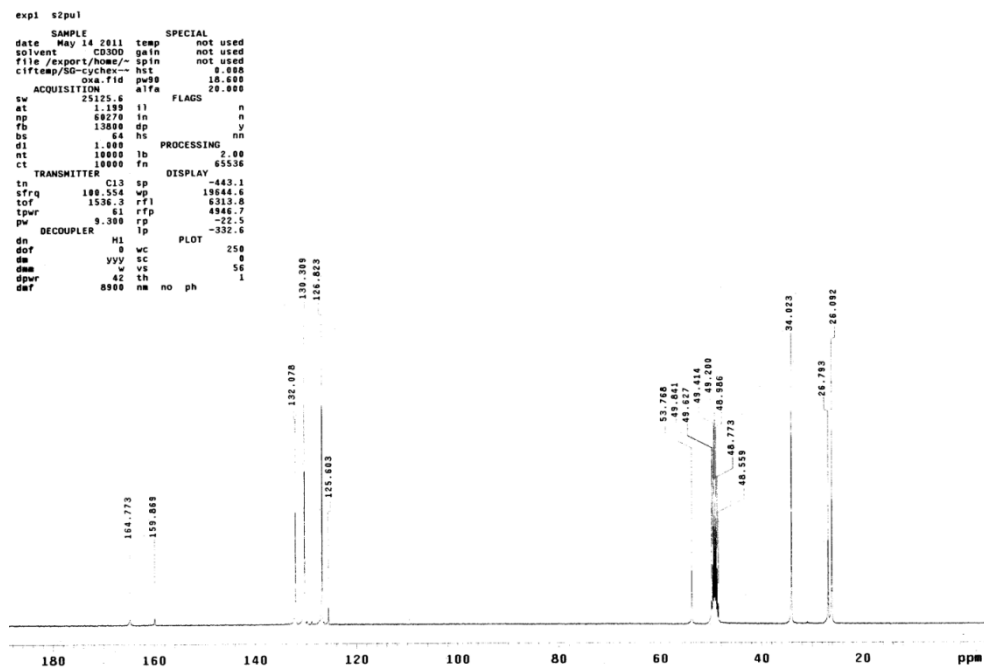

(*R*)-5-Phenyl-*N*-(1-phenylethyl)-1,3,4-oxadiazol-2-amine (16a):  $^1\text{H}$  NMR ( $\text{CD}_3\text{OD}$ , 400 MHz)

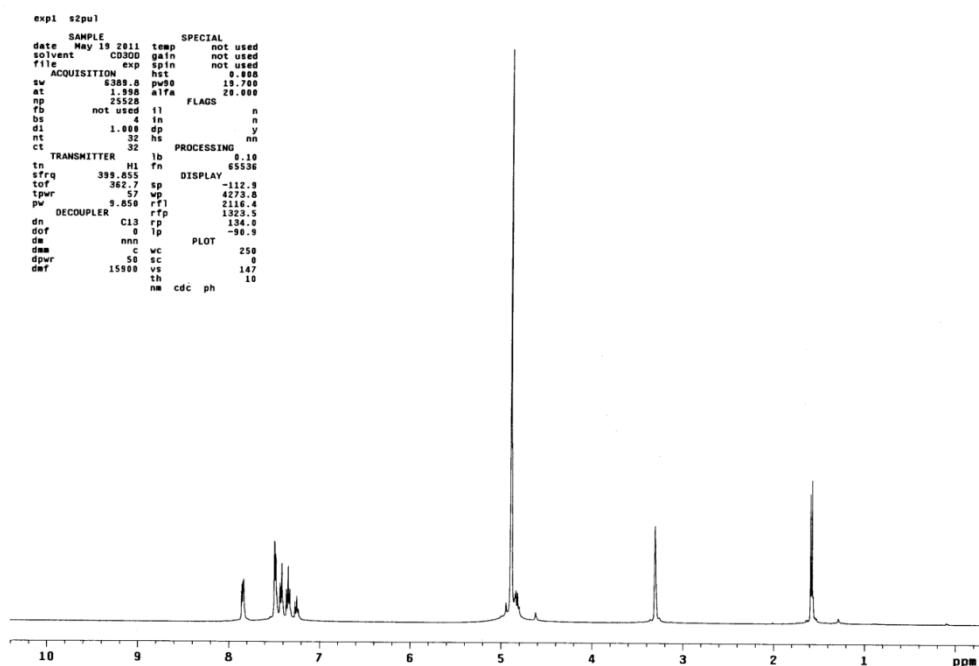

(*R*)-5-Phenyl-*N*-(1-phenylethyl)-1,3,4-oxadiazol-2-amine (16a):  $^{13}\text{C}$  NMR ( $\text{CD}_3\text{OD}$ , 100 MHz)

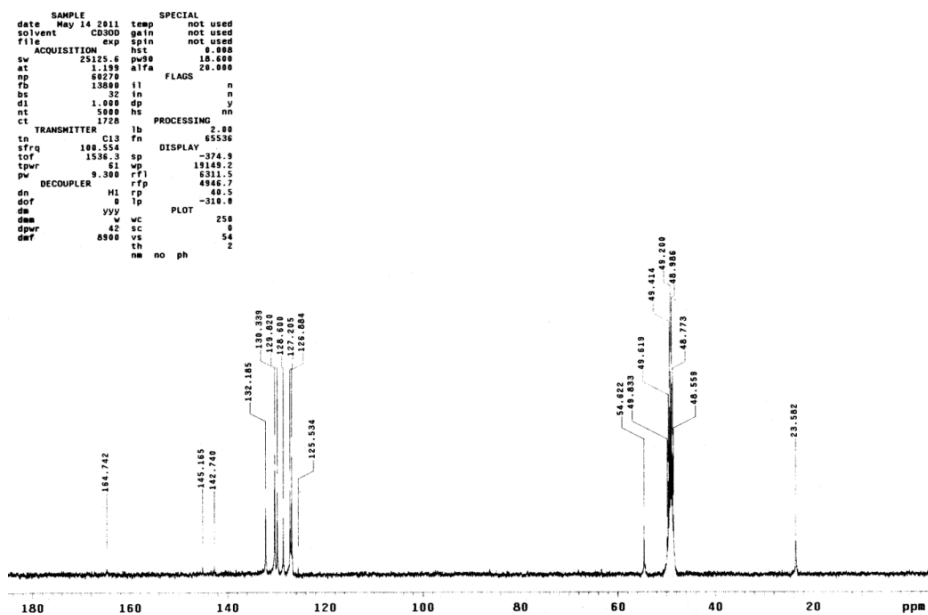

**(R)-5-Phenyl-N-(1-phenylethyl)-1,3,4-oxadiazol-2-amine (16a): (Mass Spectra)**

| Instrument Name | Instrument 1 | User Name              |                      |
|-----------------|--------------|------------------------|----------------------|
| SampleType      | Sample       | IRM Calibration Status | Success              |
| Comment         |              | Acquired Time          | 5/10/2011 5:05:33 PM |

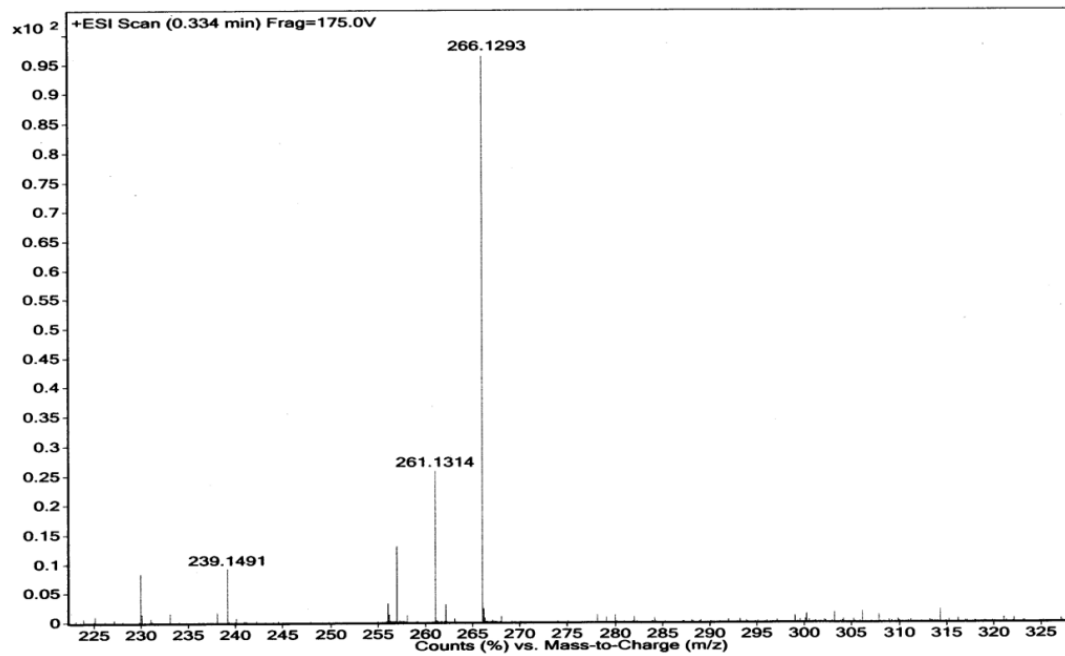

Supplement: c2ra00044j.pdf [file c2ra00044j.pdf]
